# Supplementary material for: Anti-apoptotic Regulation Contributes to the Successful Nuclear Reprogramming Using Cryopreserved Oocytes
Source: PubMed Central journal article supplement — Stem Cell Reports. 2019 Feb 21;12(3):545–56. doi: 10.1016/j.stemcr.2019.01.019 (PMC6411484; doi:10.1016/j.stemcr.2019.01.019), 2019-02-21
Supplement: mmc1.pdf [file mmc1.pdf]

**Stem Cell Reports, Volume 12**

**Supplemental Information**

**Anti-apoptotic Regulation Contributes to the Successful Nuclear Re-programming Using Cryopreserved Oocytes**

**Ah Reum Lee, Kwonho Hong, Seo Hye Choi, Chanhyeok Park, Jae Kyun Park, Jin Il Lee, Jae Il Bang, Dong-Won Seol, Jeoung Eun Lee, and Dong Ryul Lee**

**Title: Anti-apoptotic regulation contributes successful nuclear reprogramming using cryopreserved oocytes**

**Authors:**

**Ah Reum Lee<sup>1,5</sup>, Kwon Ho Hong<sup>2,5</sup>, Seo Hye Choi<sup>1</sup>, Chan Hyeok Park<sup>2</sup>, Jae Kyun Park<sup>3</sup>, Jin Il Lee<sup>3</sup>, Jae Il Bang<sup>1</sup>, Dong-Wong Seol<sup>1</sup>, Jeoung Eun Lee, Dong Ryul Lee<sup>1,4,\*</sup>**

<sup>1</sup>Department of Biomedical Science, College of Life Science, CHA University, Seoul, Korea.

<sup>2</sup>Department of Stem Cell and Regenerative Biotechnology, Konkuk University, Seoul, Korea.

<sup>3</sup>Fertility Center of CHA Gangnam Medical Center, College of Medicine, CHA University, Seoul, Korea.

<sup>4</sup>CHA Stem Cell Institute, CHA University, Seoul, Korea.

<sup>5</sup> These authors contributed equally to this study.

**\* To whom correspondence may be addressed: Dong Ryul Lee, Ph.D.**, Department of Biomedical Science, College of Life Science, CHA University, 335 Pankyo-ro, Seongnam-si, Gyeonggi-do 13488, Korea. Tel: +82-31-881-7136, Fax: +82-31-881-7100, E-mail: drleedr@cha.ac.kr

**Running Head:** *Somatic cell nuclear transfer using cryopreserved oocytes*

**Acknowledgement:** This research was supported partly by the Bio & Medical Technology Development Program of the National Research Foundation (NRF) and funded by the Korean government MSIT (2015M3A9C6028961, 2017M3A9C6061284 and 2017M3A9C8029318). All authors state that they have no conflicts of interest to disclose.

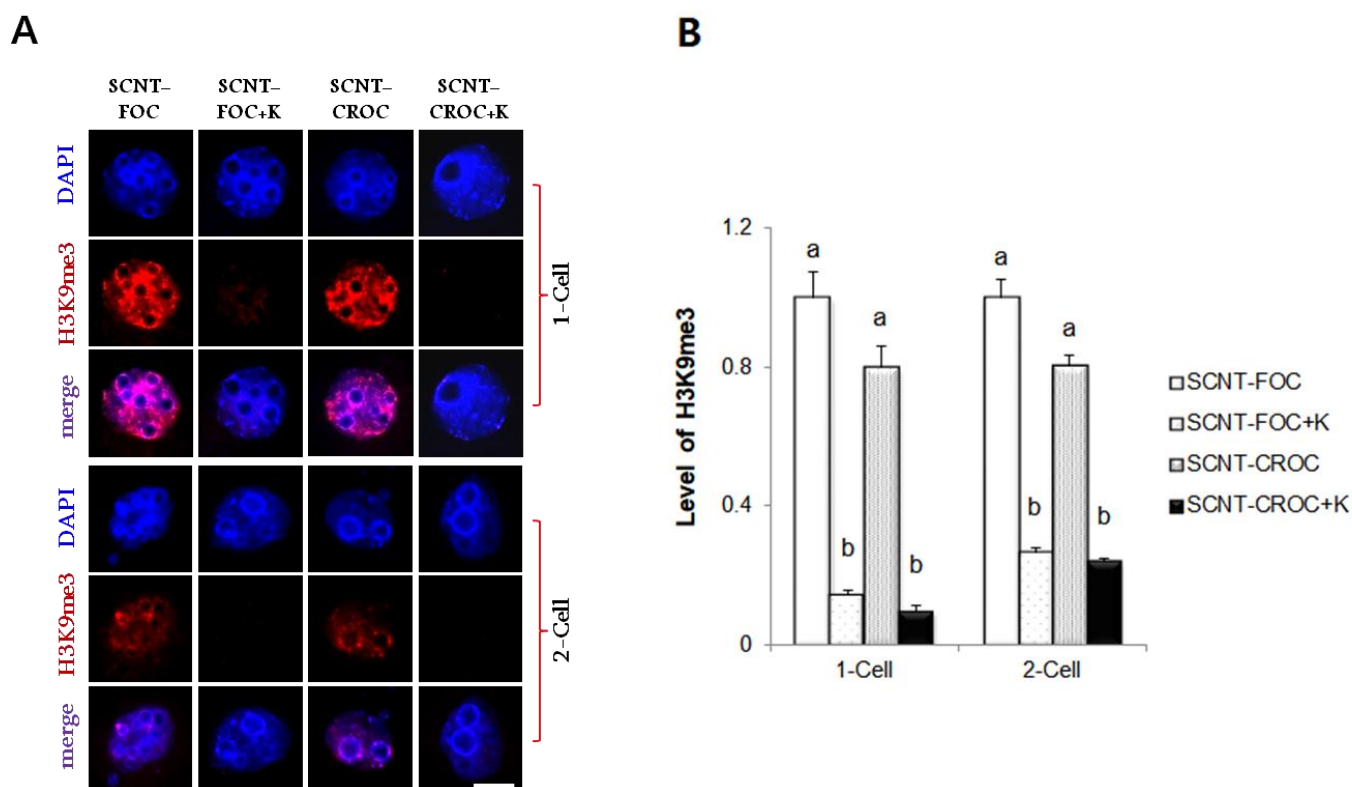

**FIGURE S1. Injection of *Kdm4a* mRNA removes H3K9me3 of SCNT embryos using fresh oocyte cytoplasm (SCNT-FOC) and cryopreserved oocyte cytoplasm (SCNT-CROC) at the 1-cell and 2-cell stage (related to Table 1). A) Representative nuclear images of 1-cell and 2-cell stage SCNT embryos stained with anti-H3K9me3 and DAPI. Shown in each panel is a nucleus of a single blastomere. Scale bar, 10  $\mu$ m. B) Bar graph showing reduced expression intensity of H3K9me3 between cloned embryos from SCNT-FOC and SCNT-CROC groups at the 1-cell and 2-cell stage.**

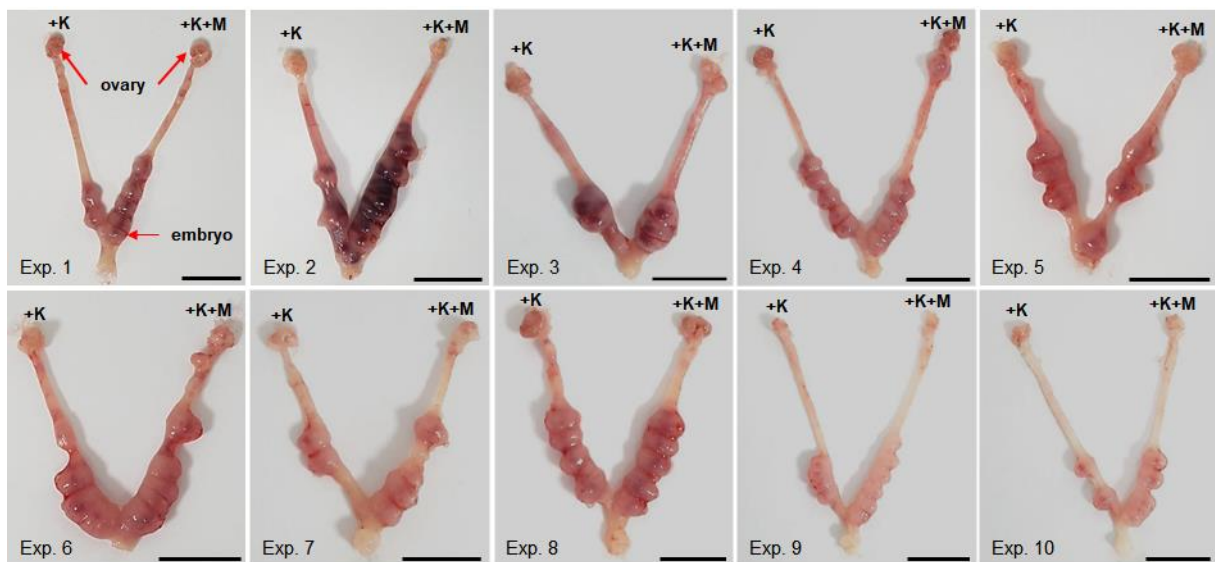

**FIGURE S2. Photographs of uteri with implantation sites at day 7 (related to Fig.4).** Allows indicate ovary and implantation site, respectively. In 9 out of 11 experiments, the number of implantation sites was increased in the SCNT-CROC+M+K group compared to those in the SCNT-CROC+K group.

## Reference of Table S1 and S2

1. GU B, ZHANG J, CHEN Q et al. Aire regulates the expression of differentiation-associated genes and self-renewal of embryonic stem cells. *Biochemical and biophysical research communications* 2010; **394**:418-23.
2. SHEN Y, MCMACKIN MZ, SHAN Y et al. Frataxin Deficiency Promotes Excess Microglial DNA Damage and Inflammation that Is Rescued by PJ34. *PloS one* 2016; **11**:e0151026.
3. CARLETTI B, PIERMARINI E, TOZZI G et al. Frataxin silencing inactivates mitochondrial Complex I in NSC34 motoneuronal cells and alters glutathione homeostasis. *International journal of molecular sciences* 2014; **15**:5789-806.
4. CALMELS N, SCHMUCKER S, WATTENHOFER-DONZE M et al. The first cellular models based on frataxin missense mutations that reproduce spontaneously the defects associated with Friedreich ataxia. *PloS one* 2009; **4**:e6379.
5. PFISTER AS, KEIL M , KUHL M The Wnt Target Protein Peter Pan Defines a Novel p53-independent Nucleolar Stress-Response Pathway. *The Journal of biological chemistry* 2015; **290**:10905-18.
6. VILLALBA-BENITO L, TORROGLOSA A, FERNANDEZ RM et al. Overexpression of DNMT3b target genes during Enteric Nervous System development contribute to the onset of Hirschsprung disease. *Scientific reports* 2017; **7**:6221.
7. LEE HJ, PAZIN DE, KAHLON RS et al. Novel markers of early ovarian pre-granulosa cells are expressed in an Sry-like pattern. *Developmental dynamics : an official publication of the American Association of Anatomists* 2009; **238**:812-25.
8. HOPKINS J, HWANG G, JACOB J et al. Meiosis-specific cohesin component, Stag3 is essential for maintaining centromere chromatid cohesion, and required for DNA repair and synapsis between homologous chromosomes. *PLoS genetics* 2014; **10**:e1004413.
9. LLANO E, GOMEZ HL, GARCIA-TUNON I et al. STAG3 is a strong candidate gene for male infertility. *Human molecular genetics* 2014; **23**:3421-31.
10. FUKUDA T, FUKUDA N, AGOSTINHO A et al. STAG3-mediated stabilization of REC8 cohesin complexes promotes chromosome synapsis during meiosis. *The EMBO journal* 2014; **33**:1243-55.
11. BREUSS MW, SULTAN T, JAMES KN et al. Autosomal-Recessive Mutations in the tRNA Splicing Endonuclease Subunit TSEN15 Cause Pontocerebellar Hypoplasia and Progressive Microcephaly. *American journal of human genetics* 2016; **99**:228-35.
12. ZHAO XS, FU WY, HUNG KW et al. NRC-interacting factor directs neurite outgrowth in an activity-dependent manner. *Neuroscience* 2015; **289**:207-13.
13. YANG YJ, BALTUS AE, MATHEW RS et al. Microcephaly gene links trithorax and REST/NRSF to control neural stem cell proliferation and differentiation. *Cell* 2012; **151**:1097-112.
14. HAYASHI M, TOJO A, SHIMOSAWA T et al. The role of adrenomedullin in the renal NADPH oxidase and (pro)renin in diabetic mice. *Journal of diabetes research* 2013; **2013**:134395.
15. VERGANO-VERA E, FERNANDEZ AP, HURTADO-CHONG A et al. Lack of adrenomedullin affects growth and differentiation of adult neural stem/progenitor cells. *Cell and tissue research* 2010; **340**:1-11.
16. ALBERTSEN M, TEPERER M, ELHOLM G et al. Localization and differential expression of the Kruppel-associated box zinc finger proteins 1 and 54 in early mouse development. *DNA and cell biology* 2010; **29**:589-601.

17. JIANG J, LV W, YE X et al. Zscan4 promotes genomic stability during reprogramming and dramatically improves the quality of iPS cells as demonstrated by tetraploid complementation. *Cell research* 2013; **23**:92-106.
18. RAUNER M, FOGER-SAMWALD U, KURZ MF et al. Cathepsin S controls adipocytic and osteoblastic differentiation, bone turnover, and bone microarchitecture. *Bone* 2014; **64**:281-7.
19. WANG B, SUN J, KITAMOTO S et al. Cathepsin S controls angiogenesis and tumor growth via matrix-derived angiogenic factors. *The Journal of biological chemistry* 2006; **281**:6020-9.
20. ZHENG T, KANG MJ, CROTHERS K et al. Role of cathepsin S-dependent epithelial cell apoptosis in IFN-gamma-induced alveolar remodeling and pulmonary emphysema. *Journal of immunology* 2005; **174**:8106-15.
21. BOULARES AH, ZOLTOSKI AJ, SHERIF ZA et al. Roles of DNA fragmentation factor and poly(ADP-ribose) polymerase-1 in sensitization of fibroblasts to tumor necrosis factor-induced apoptosis. *Biochemical and biophysical research communications* 2002; **290**:796-801.
22. YAN B, WANG H, PENG Y et al. A unique role of the DNA fragmentation factor in maintaining genomic stability. *Proceedings of the National Academy of Sciences of the United States of America* 2006; **103**:1504-9.
23. LEE JY, KIM HJ, RHO SB et al. eIF3f reduces tumor growth by directly interrupting clusterin with anti-apoptotic property in cancer cells. *Oncotarget* 2016; **7**:18541-57.
24. SHI J, HERSHEY JW , NELSON MA Phosphorylation of the eukaryotic initiation factor 3f by cyclin-dependent kinase 11 during apoptosis. *FEBS letters* 2009; **583**:971-7.
25. FRACCASCIA P, CASTEELS M, DE SCHRYVER E et al. Role of thiamine pyrophosphate in oligomerisation, functioning and import of peroxisomal 2-hydroxyacyl-CoA lyase. *Biochimica et biophysica acta* 2011; **1814**:1226-33.
26. ROGON C, ULBRICHT A, HESSE M et al. HSP70-binding protein HSPBP1 regulates chaperone expression at a posttranslational level and is essential for spermatogenesis. *Molecular biology of the cell* 2014; **25**:2260-71.
27. LENG JJ, TAN HM, CHEN K et al. Growth-inhibitory effects of MOB2 on human hepatic carcinoma cell line SMMC-7721. *World journal of gastroenterology* 2012; **18**:7285-9.
28. GOMEZ V, GUNDOGDU R, GOMEZ M et al. Regulation of DNA damage responses and cell cycle progression by hMOB2. *Cellular signalling* 2015; **27**:326-39.
29. SUN XX, DAI MS , LU H 5-fluorouracil activation of p53 involves an MDM2-ribosomal protein interaction. *The Journal of biological chemistry* 2007; **282**:8052-9.
30. LIU L, LUO C, LUO Y et al. MRPL33 and its splicing regulator hnRNPk are required for mitochondria function and implicated in tumor progression. *Oncogene* 2018; **37**:86-94.
31. WANG J, LIU Y, LIU F et al. Loss-of-function Mutation in PMVK Causes Autosomal Dominant Disseminated Superficial Porokeratosis. *Scientific reports* 2016; **6**:24226.
32. ROY S, PRANEETHA DC , VENDRA VP Mutations in the Corneal Endothelial Dystrophy-Associated Gene SLC4A11 Render the Cells More Vulnerable to Oxidative Insults. *Cornea* 2015; **34**:668-74.
33. LIU J, SEET LF, KOH LW et al. Depletion of SLC4A11 causes cell death by apoptosis in an immortalized human corneal endothelial cell line. *Investigative ophthalmology & visual science* 2012; **53**:3270-9.
34. JANGANI M, POOLMAN TM, MATTHEWS L et al. The methyltransferase WBSR22/Merm1 enhances glucocorticoid receptor function and is regulated in lung inflammation and cancer. *The Journal of*

- biological chemistry 2014; **289**:8931-46.
35. YAN D, TU L, YUAN H et al. WBSCR22 confers oxaliplatin resistance in human colorectal cancer. *Scientific reports* 2017; **7**:15443.
  36. OUNAP K, KASPER L, KURG A et al. The human WBSCR22 protein is involved in the biogenesis of the 40S ribosomal subunits in mammalian cells. *PloS one* 2013; **8**:e75686.
  37. OKADA R, WU Z, ZHU A et al. Cathepsin D deficiency induces oxidative damage in brain pericytes and impairs the blood-brain barrier. *Molecular and cellular neurosciences* 2015; **64**:51-60.
  38. YANG D, MENG X, XUE B et al. MiR-942 mediates hepatitis C virus-induced apoptosis via regulation of ISG12a. *PloS one* 2014; **9**:e94501.
  39. CHEN Y, JIAO B, YAO M et al. ISG12a inhibits HCV replication and potentiates the anti-HCV activity of IFN- $\alpha$  through activation of the Jak/STAT signaling pathway independent of autophagy and apoptosis. *Virus research* 2017; **227**:231-239.
  40. MCEVOY K, OSBORNE LM, NANAVATI J et al. Reproductive Affective Disorders: a Review of the Genetic Evidence for Premenstrual Dysphoric Disorder and Postpartum Depression. *Current psychiatry reports* 2017; **19**:94.
  41. ZHANG Z, ZHANG G, KONG C et al. METTL13 is downregulated in bladder carcinoma and suppresses cell proliferation, migration and invasion. *Scientific reports* 2016; **6**:19261.
  42. BLADT F, AIPPERSBACH E, GELKOP S et al. The murine Nck SH2/SH3 adaptors are important for the development of mesoderm-derived embryonic structures and for regulating the cellular actin network. *Molecular and cellular biology* 2003; **23**:4586-97.
  43. XIAHOU Z, WANG X, SHEN J et al. NMI and IFP35 serve as proinflammatory DAMPs during cellular infection and injury. *Nature communications* 2017; **8**:950.
  44. WANG J, ZOU K, FENG X et al. Downregulation of NMI promotes tumor growth and predicts poor prognosis in human lung adenocarcinomas. *Molecular cancer* 2017; **16**:158.
  45. MATSUDA S, OKADA N, KODAMA T et al. A cytotoxic type III secretion effector of *Vibrio parahaemolyticus* targets vacuolar H<sup>+</sup>-ATPase subunit c and ruptures host cell lysosomes. *PLoS pathogens* 2012; **8**:e1002803.
  46. FAN SH, WANG YY, WU ZY et al. AGPAT9 suppresses cell growth, invasion and metastasis by counteracting acidic tumor microenvironment through KLF4/LASS2/V-ATPase signaling pathway in breast cancer. *Oncotarget* 2015; **6**:18406-17.
  47. WANG H, DONG J, SHI P et al. Anti-mouse CD52 monoclonal antibody ameliorates intestinal epithelial barrier function in interleukin-10 knockout mice with spontaneous chronic colitis. *Immunology* 2015; **144**:254-62.
  48. ISSHIKI K, MATSUDA S, TSUJI A et al. cGMP-dependent protein kinase I promotes cell apoptosis through hyperactivation of death-associated protein kinase 2. *Biochemical and biophysical research communications* 2012; **422**:280-4.
  49. YUASA K, OTA R, MATSUDA S et al. Suppression of death-associated protein kinase 2 by interaction with 14-3-3 proteins. *Biochemical and biophysical research communications* 2015; **464**:70-5.
  50. MORQUETTE B, MORQUETTE P, AGOSTINONE J et al. REDD2-mediated inhibition of mTOR promotes dendrite retraction induced by axonal injury. *Cell death and differentiation* 2015; **22**:612-25.
  51. LUTHER J, GALA M, PATEL SJ et al. Loss of Response to Anti-Tumor Necrosis Factor Alpha Therapy in Crohn's Disease Is Not Associated with Emergence of Novel Inflammatory Pathways. *Digestive diseases and sciences* 2018; **63**:738-745.

52. MACFIE TS, POULSOM R, PARKER A et al. DUOX2 and DUOXA2 form the predominant enzyme system capable of producing the reactive oxygen species H<sub>2</sub>O<sub>2</sub> in active ulcerative colitis and are modulated by 5-aminosalicylic acid. *Inflammatory bowel diseases* 2014; **20**:514-24.
53. CHANG NS The non-ankyrin C terminus of Ikappa Balpha physically interacts with p53 in vivo and dissociates in response to apoptotic stress, hypoxia, DNA damage, and transforming growth factor-beta 1-mediated growth suppression. *The Journal of biological chemistry* 2002; **277**:10323-31.
54. BROUARD S, BERBERAT PO, TOBIASCH E et al. Heme oxygenase-1-derived carbon monoxide requires the activation of transcription factor NF-kappa B to protect endothelial cells from tumor necrosis factor-alpha-mediated apoptosis. *The Journal of biological chemistry* 2002; **277**:17950-61.
55. OMORI K, MORIKAWA T, KUNITA A et al. Lipocalin-type prostaglandin D synthase-derived PGD<sub>2</sub> attenuates malignant properties of tumor endothelial cells. *The Journal of pathology* 2018; **244**:84-96.
56. ZHANG B, BIE Q, WU P et al. PGD<sub>2</sub>/PTGDR2 Signaling Restricts the Self-Renewal and Tumorigenesis of Gastric Cancer. *Stem cells* 2018.
57. MARCHETTE LD, THOMPSON DA, KRAVTSOVA M et al. Retinol dehydrogenase 12 detoxifies 4-hydroxynonenal in photoreceptor cells. *Free radical biology & medicine* 2010; **48**:16-25.
58. HERNANDEZ-SANCHEZ M, POCH E, GUASCH RM et al. RhoE is required for contact inhibition and negatively regulates tumor initiation and progression. *Oncotarget* 2015; **6**:17479-90.
59. XUAN DY, LI X, DENG ZH et al. Identification and characterization of a novel gene, Mcpr1, and its possible function in the proliferation of embryonic palatal mesenchymal cells. *The Journal of biological chemistry* 2006; **281**:33997-4008.
60. SHI R, ZHANG C, WU Y et al. CDCA2 promotes lung adenocarcinoma cell proliferation and predicts poor survival in lung adenocarcinoma patients. *Oncotarget* 2017; **8**:19768-19779.
61. UCHIDA F, UZAWA K, KASAMATSU A et al. Overexpression of CDCA2 in human squamous cell carcinoma: correlation with prevention of G1 phase arrest and apoptosis. *PloS one* 2013; **8**:e56381.
62. VAGNARELLI P, RIBEIRO S, SENNELS L et al. Repo-Man coordinates chromosomal reorganization with nuclear envelope reassembly during mitotic exit. *Developmental cell* 2011; **21**:328-42.
63. PENG A, LEWELLYN AL, SCHIEMANN WP et al. Repo-man controls a protein phosphatase 1-dependent threshold for DNA damage checkpoint activation. *Current biology : CB* 2010; **20**:387-96.
64. AMIABLE C, POCHET S, PADILLA A et al. N (6)-substituted AMPs inhibit mammalian deoxynucleotide N-hydrolase DNP1. *PloS one* 2013; **8**:e80755.
65. FAN Y , GUO Y Knockdown of eIF3D inhibits breast cancer cell proliferation and invasion through suppressing the Wnt/beta-catenin signaling pathway. *International journal of clinical and experimental pathology* 2015; **8**:10420-7.
66. REN M, ZHOU C, LIANG H et al. RNAi-Mediated Silencing of EIF3D Alleviates Proliferation and Migration of Glioma U251 and U87MG Cells. *Chemical biology & drug design* 2015; **86**:715-22.
67. MACK DL, BOULANGER CA, CALLAHAN R et al. Expression of truncated Int6/eIF3e in mammary alveolar epithelium leads to persistent hyperplasia and tumorigenesis. *Breast cancer research : BCR* 2007; **9**:R42.
68. SHAH M, SU D, SCHELIGA JS et al. A Transcript-Specific eIF3 Complex Mediates Global Translational Control of Energy Metabolism. *Cell reports* 2016; **16**:1891-902.
69. YI P, GAO S, GU Z et al. P44/WDR77 restricts the sensitivity of proliferating cells to TGFbeta signaling. *Biochemical and biophysical research communications* 2014; **450**:409-15.
70. CHAO YX, HE BP, CAO Q et al. Protein aggregate-containing neuron-like cells are differentiated from bone



- marrow mesenchymal stem cells from mice with neurofilament light subunit gene deficiency. *Neuroscience letters* 2007; **417**:240-5.
71. CAPASSO M, DISKIN S, CIMMINO F et al. Common genetic variants in NEFL influence gene expression and neuroblastoma risk. *Cancer research* 2014; **74**:6913-24.
  72. TAO J, TAO S, HAN J et al. RECQL1 plays an important role in the development of tongue squamous cell carcinoma. *Cellular physiology and biochemistry : international journal of experimental cellular physiology, biochemistry, and pharmacology* 2014; **33**:1579-90.
  73. REN J, YANG Y, XUE J et al. Long noncoding RNA SNHG7 promotes the progression and growth of glioblastoma via inhibition of miR-5095. *Biochemical and biophysical research communications* 2018; **496**:712-718.
  74. SHE K, HUANG J, ZHOU H et al. lncRNA-SNHG7 promotes the proliferation, migration and invasion and inhibits apoptosis of lung cancer cells by enhancing the FAIM2 expression. *Oncology reports* 2016; **36**:2673-2680.
  75. GENG Y, LEE YM, WELCKER M et al. Kinase-independent function of cyclin E. *Molecular cell* 2007; **25**:127-39.
  76. DONANGELO I, REN SG, EIGLER T et al. Sca1(+) murine pituitary adenoma cells show tumor-growth advantage. *Endocrine-related cancer* 2014; **21**:203-16.
  77. TOUSOULIS D, BRIASOULIS A, VOGIATZI G et al. Infusion of lin-/sca-1+ and endothelial progenitor cells improves proinflammatory and oxidative stress markers in atherosclerotic mice. *International journal of cardiology* 2013; **167**:1900-5.
  78. SAINT FLEUR S, HOSHINO A, KONDO K et al. Regulation of Fas-mediated immune homeostasis by an activation-induced protein, Cyclon. *Blood* 2009; **114**:1355-65.
  79. YANG Y, ZHOU QJ, CHEN XQ et al. Profiling of differentially expressed genes in sheep T lymphocytes response to an artificial primary *Haemonchus contortus* infection. *Parasites & vectors* 2015; **8**:235.
  80. FLOUDAS A, SAUNDERS SP, MORAN T et al. IL-17 Receptor A Maintains and Protects the Skin Barrier To Prevent Allergic Skin Inflammation. *Journal of immunology* 2017; **199**:707-717.
  81. RIVERA J NTAL/LAB and LAT: a balancing act in mast-cell activation and function. *Trends in immunology* 2005; **26**:119-22.
  82. KORBER I, KATAYAMA S, EINARSDOTTIR E et al. Gene-Expression Profiling Suggests Impaired Signaling via the Interferon Pathway in *Cstb*<sup>-/-</sup> Microglia. *PloS one* 2016; **11**:e0158195.
  83. WANG Z, SUN B , ZHU F Molecular characterization of glutaminyl-peptide cyclotransferase(QPCT)in *Scylla paramamosain* and its role in *Vibrio alginolyticus* and white spot syndrome virus (WSSV) infection. *Fish & shellfish immunology* 2018; **78**:299-309.
  84. KARTBERG F, ASP L, DEJGAARD SY et al. ARFGAP2 and ARFGAP3 are essential for COPI coat assembly on the Golgi membrane of living cells. *The Journal of biological chemistry* 2010; **285**:36709-20.
  85. SAITOH A, SHIN HW, YAMADA A et al. Three homologous ArfGAPs participate in coat protein I-mediated transport. *The Journal of biological chemistry* 2009; **284**:13948-57.
  86. MARTINEZ A, YAMASHITA S, NAGAIKE T et al. Human BCDIN3D monomethylates cytoplasmic histidine transfer RNA. *Nucleic acids research* 2017; **45**:5423-5436.
  87. MCKINLEY KL, SEKULIC N, GUO LY et al. The CENP-L-N Complex Forms a Critical Node in an Integrated Meshwork of Interactions at the Centromere-Kinetochore Interface. *Molecular cell* 2015; **60**:886-98.
  88. MARJANOVIC M, SANCHEZ-HUERTAS C, TERRE B et al. CEP63 deficiency promotes p53-dependent

- microcephaly and reveals a role for the centrosome in meiotic recombination. *Nature communications* 2015; **6**:7676.
89. LOFFLER H, FECHTER A, MATUSZEWSKA M et al. Cep63 recruits Cdk1 to the centrosome: implications for regulation of mitotic entry, centrosome amplification, and genome maintenance. *Cancer research* 2011; **71**:2129-39.
90. ZHAO H, ZHU L, ZHU Y et al. The Cep63 paralogue Deup1 enables massive de novo centriole biogenesis for vertebrate multiciliogenesis. *Nature cell biology* 2013; **15**:1434-44.
91. SZCZEPANOWSKA K, MAITI P, KUKAT A et al. CLPP coordinates mitoribosomal assembly through the regulation of ERAL1 levels. *The EMBO journal* 2016; **35**:2566-2583.
92. GISPERS S, PARGANLIJA D, KLINKENBERG M et al. Loss of mitochondrial peptidase Clpp leads to infertility, hearing loss plus growth retardation via accumulation of CLPX, mtDNA and inflammatory factors. *Human molecular genetics* 2013; **22**:4871-87.
93. LIU B, SU Y, LI T et al. CMTM7 knockdown increases tumorigenicity of human non-small cell lung cancer cells and EGFR-AKT signaling by reducing Rab5 activation. *Oncotarget* 2015; **6**:41092-107.
94. KAKO K, TAKEHARA A, ARAI H et al. A selective requirement for copper-dependent activation of cytochrome c oxidase by Cox17p. *Biochemical and biophysical research communications* 2004; **324**:1379-85.
95. ONABAJO OO, SEELEY MK, KALE A et al. Actin-binding protein 1 regulates B cell receptor-mediated antigen processing and presentation in response to B cell receptor activation. *Journal of immunology* 2008; **180**:6685-95.
96. CONNERT S, WIENAND S, THIEL C et al. SH3P7/mAbp1 deficiency leads to tissue and behavioral abnormalities and impaired vesicle transport. *The EMBO journal* 2006; **25**:1611-22.
97. YUDIN AI, TOLLNER TL, TREECE CA et al. Beta-defensin 22 is a major component of the mouse sperm glycocalyx. *Reproduction* 2008; **136**:753-65.
98. HA S, LINDSAY AM, TIMMS AE et al. Mutations in Dnaaf1 and Lrrc48 Cause Hydrocephalus, Laterality Defects, and Sinusitis in Mice. *G3* 2016; **6**:2479-87.
99. VAN ROOIJEN E, GILES RH, VOEST EE et al. LRRC50, a conserved ciliary protein implicated in polycystic kidney disease. *Journal of the American Society of Nephrology : JASN* 2008; **19**:1128-38.
100. PHILLIPS NJ, ZEIGLER MR, DEAVEN LL A cDNA from the ovarian cancer critical region of deletion on chromosome 17p13.3. *Cancer letters* 1996; **102**:85-90.
101. SEVAJOL M, REISER JB, CHOUQUET A et al. The C-terminal polyproline-containing region of ELMO contributes to an increase in the life-time of the ELMO-DOCK complex. *Biochimie* 2012; **94**:823-8.
102. JAWOREK TJ, RICHARD EM, IVANOVA AA et al. An alteration in ELMOD3, an Arl2 GTPase-activating protein, is associated with hearing impairment in humans. *PLoS genetics* 2013; **9**:e1003774.
103. TAKEMOTO N, YOSHIMURA T, MIYAZAKI S et al. Gtsf1l and Gtsf2 Are Specifically Expressed in Gonocytes and Spermatids but Are Not Essential for Spermatogenesis. *PLoS one* 2016; **11**:e0150390.
104. CHOU TF, CHENG J, TIKH IB et al. Evidence that human histidine triad nucleotide binding protein 3 (Hint3) is a distinct branch of the histidine triad (HIT) superfamily. *Journal of molecular biology* 2007; **373**:978-89.
105. YOSHIKAWA K, MATSUI E, KANEKO H et al. A novel single-nucleotide substitution, Glu 4 Lys, in the leukotriene C4 synthase gene associated with allergic diseases. *International journal of molecular medicine* 2005; **16**:827-31.
106. HE P, LAIDLAW T, MAEKAWA A et al. Oxidative stress suppresses cysteinyl leukotriene generation by

- mouse bone marrow-derived mast cells. *The Journal of biological chemistry* 2011; **286**:8277-86.
107. CHU J, HONG NA, MASUDA CA et al. A mouse forward genetics screen identifies LISTERIN as an E3 ubiquitin ligase involved in neurodegeneration. *Proceedings of the National Academy of Sciences of the United States of America* 2009; **106**:2097-103.
108. OSSAREH-NAZARI B, NINO CA, BENGTSON MH et al. Ubiquitylation by the Ltn1 E3 ligase protects 60S ribosomes from starvation-induced selective autophagy. *The Journal of cell biology* 2014; **204**:909-17.
109. WEBB BD, WHEELER PG, HAGEN JJ et al. Novel, compound heterozygous, single-nucleotide variants in MARS2 associated with developmental delay, poor growth, and sensorineural hearing loss. *Human mutation* 2015; **36**:587-92.
110. TEVES ME, JHA KN, SONG J et al. Germ cell-specific disruption of the Meig1 gene causes impaired spermiogenesis in mice. *Andrology* 2013; **1**:37-46.
111. LOHOFF FW, FERRARO TN, BRODKIN ES et al. Association between polymorphisms in the metallophosphoesterase (MPPE1) gene and bipolar disorder. *American journal of medical genetics Part B, Neuropsychiatric genetics : the official publication of the International Society of Psychiatric Genetics* 2010; **153B**:830-6.
112. KONISHI H, TASHIRO K, MURATA Y et al. CFBP is a novel tyrosine-phosphorylated protein that might function as a regulator of CIN85/CD2AP. *The Journal of biological chemistry* 2006; **281**:28919-31.
113. MICHIHARA A, IDE N, MIZUTANI Y et al. Involvement of microRNA214 and transcriptional regulation in reductions in mevalonate pyrophosphate decarboxylase mRNA levels in stroke-prone spontaneously hypertensive rat livers. *Bioscience, biotechnology, and biochemistry* 2015; **79**:1759-70.
114. LEBON S, MINAI L, CHRETIEN D et al. A novel mutation of the NDUFS7 gene leads to activation of a cryptic exon and impaired assembly of mitochondrial complex I in a patient with Leigh syndrome. *Molecular genetics and metabolism* 2007; **92**:104-8.
115. MONIZ LS, SURINOVA S, GHAZALY E et al. Phosphoproteomic comparison of Pik3ca and Pten signalling identifies the nucleotidase NT5C as a novel AKT substrate. *Scientific reports* 2017; **7**:39985.
116. HAQUE ME, ELMORE KB, TRIPATHY A et al. Properties of the C-terminal tail of human mitochondrial inner membrane protein Oxa1L and its interactions with mammalian mitochondrial ribosomes. *The Journal of biological chemistry* 2010; **285**:28353-62.
117. CHURCH C, GOEHRING B, FORSHA D et al. A role for Pet100p in the assembly of yeast cytochrome c oxidase: interaction with a subassembly that accumulates in a pet100 mutant. *The Journal of biological chemistry* 2005; **280**:1854-63.
118. BELLIZZI D, DATO S, CAVALCANTE P et al. Characterization of a bidirectional promoter shared between two human genes related to aging: SIRT3 and PSMD13. *Genomics* 2007; **89**:143-50.
119. HIRANO Y, HAYASHI H, IEMURA S et al. Cooperation of multiple chaperones required for the assembly of mammalian 20S proteasomes. *Molecular cell* 2006; **24**:977-84.
120. WANG HM, XU YF, NING SL et al. The catalytic region and PEST domain of PTPN18 distinctly regulate the HER2 phosphorylation and ubiquitination barcodes. *Cell research* 2014; **24**:1067-90.
121. ZHANG X, WU M, XIAO H et al. Methylation of a single intronic CpG mediates expression silencing of the PMP24 gene in prostate cancer. *The Prostate* 2010; **70**:765-76.
122. HAO GJ, DING YH, WEN H et al. Attenuation of deregulated miR-369-3p expression sensitizes non-small cell lung cancer cells to cisplatin via modulation of the nucleotide sugar transporter SLC35F5. *Biochemical and biophysical research communications* 2017; **488**:501-508.

123. FAJARDO VA, RIETZE BA, CHAMBERS PJ et al. Effects of sarcolipin deletion on skeletal muscle adaptive responses to functional overload and unload. *American journal of physiology Cell physiology* 2017; **313**:C154-C161.
124. LI J, ZHOU F, ZHAN D et al. A novel histone H4 arginine 3 methylation-sensitive histone H4 binding activity and transcriptional regulatory function for signal recognition particle subunits SRP68 and SRP72. *The Journal of biological chemistry* 2012; **287**:40641-51.
125. NAGAMINE S, TAMBA M, ISHIMINE H et al. Organ-specific sulfation patterns of heparan sulfate generated by extracellular sulfatases Sulf1 and Sulf2 in mice. *The Journal of biological chemistry* 2012; **287**:9579-90.
126. BERGE T, LEIKFOSS IS, BRORSON IS et al. The multiple sclerosis susceptibility genes TAGAP and IL2RA are regulated by vitamin D in CD4+ T cells. *Genes and immunity* 2016; **17**:118-27.
127. GODFROY O, UJI T, NAGASATO C et al. DISTAG/TBCCd1 Is Required for Basal Cell Fate Determination in Ectocarpus. *The Plant cell* 2017; **29**:3102-3122.
128. KANEKO KJ , DEPAMPHILIS ML TEAD4 establishes the energy homeostasis essential for blastocoel formation. *Development* 2013; **140**:3680-90.
129. BENHADDOU A, KEIME C, YE T et al. Transcription factor TEAD4 regulates expression of myogenin and the unfolded protein response genes during C2C12 cell differentiation. *Cell death and differentiation* 2012; **19**:220-31.
130. NISHIOKA N, YAMAMOTO S, KIYONARI H et al. Tead4 is required for specification of trophectoderm in pre-implantation mouse embryos. *Mechanisms of development* 2008; **125**:270-83.
131. YAGI R, KOHN MJ, KARAVANOVA I et al. Transcription factor TEAD4 specifies the trophectoderm lineage at the beginning of mammalian development. *Development* 2007; **134**:3827-36.
132. ALSTON CL, COMPTON AG, FORMOSA LE et al. Biallelic Mutations in TMEM126B Cause Severe Complex I Deficiency with a Variable Clinical Phenotype. *American journal of human genetics* 2016; **99**:217-27.
133. SANCHEZ-CABALLERO L, RUZZENENTE B, BIANCHI L et al. Mutations in Complex I Assembly Factor TMEM126B Result in Muscle Weakness and Isolated Complex I Deficiency. *American journal of human genetics* 2016; **99**:208-16.
134. SHEN DW, MA J, OKABE M et al. Elevated expression of TMEM205, a hypothetical membrane protein, is associated with cisplatin resistance. *Journal of cellular physiology* 2010; **225**:822-8.
135. ROSE AE, ZHAO C, TURNER EM et al. Arresting a Torsin ATPase reshapes the endoplasmic reticulum. *The Journal of biological chemistry* 2014; **289**:552-64.
136. BAHN E, SIEGERT S, PFANDER T et al. TorsinB expression in the developing human brain. *Brain research* 2006; **1116**:112-9.
137. CHUJO T , SUZUKI T Trmt61B is a methyltransferase responsible for 1-methyladenosine at position 58 of human mitochondrial tRNAs. *Rna* 2012; **18**:2269-76.
138. YAMAMOTO Y , SAKISAKA T Molecular machinery for insertion of tail-anchored membrane proteins into the endoplasmic reticulum membrane in mammalian cells. *Molecular cell* 2012; **48**:387-97.
139. NISHIZAWA Y, KONNO M, ASAI A et al. Oncogene c-Myc promotes epitranscriptome m(6)A reader YTHDF1 expression in colorectal cancer. *Oncotarget* 2018; **9**:7476-7486.
140. ZHAO X, CHEN Y, MAO Q et al. Overexpression of YTHDF1 is associated with poor prognosis in patients with hepatocellular carcinoma. *Cancer biomarkers : section A of Disease markers* 2018; **21**:859-868.
141. GONTAN C, ACHAME EM, DEMMERS J et al. RNF12 initiates X-chromosome inactivation by targeting REX1 for degradation. *Nature* 2012; **485**:386-90.

142. XU J, SYLVESTER R, TIGHE AP et al. Transcriptional activation of the suppressor of cytokine signaling-3 (SOCS-3) gene via STAT3 is increased in F9 REX1 (ZFP-42) knockout teratocarcinoma stem cells relative to wild-type cells. *Journal of molecular biology* 2008; **377**:28-46.
143. ZHAO F, ZHOU J, LI R et al. Novel function of LHFPL2 in female and male distal reproductive tract development. *Scientific reports* 2016; **6**:23037.
144. ZUCKER B, KAMA JA, KUHN A et al. Decreased Lin7b expression in layer 5 pyramidal neurons may contribute to impaired corticostriatal connectivity in huntington disease. *Journal of neuropathology and experimental neurology* 2010; **69**:880-95.
145. HORI K, KONNO D, MARUOKA H et al. MALS is a binding partner of IRSp53 at cell-cell contacts. *FEBS letters* 2003; **554**:30-4.
146. ENO C, SOLANKI B, PELEGRI F *aura* (mid1ip1l) regulates the cytoskeleton at the zebrafish egg-to-embryo transition. *Development* 2016; **143**:1585-99.
147. WYATT JS Cerebral oxygenation and haemodynamics in the foetus and newborn infant. *Philosophical transactions of the Royal Society of London Series B, Biological sciences* 1997; **352**:697-700.
148. WU Z, DERKS MFL, DIBBITS B et al. A Novel Loss-of-Function Variant in Transmembrane Protein 263 (TMEM263) of Autosomal Dwarfism in Chicken. *Frontiers in genetics* 2018; **9**:193.
149. SMITH BN, TICOZZI N, FALLINI C et al. Exome-wide rare variant analysis identifies TUBA4A mutations associated with familial ALS. *Neuron* 2014; **84**:324-31.
150. STORM MP, KUMPFMUELLER B, THOMPSON B et al. Characterization of the phosphoinositide 3-kinase-dependent transcriptome in murine embryonic stem cells: identification of novel regulators of pluripotency. *Stem cells* 2009; **27**:764-75.
151. NAKAI-FUTATSUGI Y, NIWA H *Zscan4* Is Activated after Telomere Shortening in Mouse Embryonic Stem Cells. *Stem cell reports* 2016; **6**:483-495.
152. ZHANG D, ZHAO T, ANG HS et al. AMD1 is essential for ESC self-renewal and is translationally down-regulated on differentiation to neural precursor cells. *Genes & development* 2012; **26**:461-73.
153. NISHIMURA K, NAKATSU F, KASHIWAGI K et al. Essential role of S-adenosylmethionine decarboxylase in mouse embryonic development. *Genes to cells : devoted to molecular & cellular mechanisms* 2002; **7**:41-7.
154. MROCZEK S, CHLEBOWSKA J, KULINSKI TM et al. The non-canonical poly(A) polymerase FAM46C acts as an onco-suppressor in multiple myeloma. *Nature communications* 2017; **8**:619.
155. ZHU YX, SHI CX, BRUINS LA et al. Loss of FAM46C Promotes Cell Survival in Myeloma. *Cancer research* 2017; **77**:4317-4327.
156. ELABD C, COUSIN W, UPADHYAYULA P et al. Oxytocin is an age-specific circulating hormone that is necessary for muscle maintenance and regeneration. *Nature communications* 2014; **5**:4082.
157. LIN YT, CHEN CC, HUANG CC et al. Oxytocin stimulates hippocampal neurogenesis via oxytocin receptor expressed in CA3 pyramidal neurons. *Nature communications* 2017; **8**:537.
158. GUPTA P, SOYOMBO AA, SHELTON JM et al. Disruption of PPT2 in mice causes an unusual lysosomal storage disorder with neurovisceral features. *Proceedings of the National Academy of Sciences of the United States of America* 2003; **100**:12325-30.
159. HARRISON FE, YU SS, VAN DEN BOSSCHE KL et al. Elevated oxidative stress and sensorimotor deficits but normal cognition in mice that cannot synthesize ascorbic acid. *Journal of neurochemistry* 2008; **106**:1198-208.
160. CAO Z, FANG Y, LU Y et al. Melatonin alleviates cadmium-induced liver injury by inhibiting the TXNIP-

- NLRP3 inflammasome. *Journal of pineal research* 2017; **62**.
161. LI J, YUE Z, XIONG W et al. TXNIP overexpression suppresses proliferation and induces apoptosis in SMMC7221 cells through ROS generation and MAPK pathway activation. *Oncology reports* 2017; **37**:3369-3376.
  162. HOOG JO , OSTBERG LJ Mammalian alcohol dehydrogenases--a comparative investigation at gene and protein levels. *Chemico-biological interactions* 2011; **191**:2-7.
  163. POON HF, FRASIER M, SHREVE N et al. Mitochondrial associated metabolic proteins are selectively oxidized in A30P alpha-synuclein transgenic mice--a model of familial Parkinson's disease. *Neurobiology of disease* 2005; **18**:492-8.
  164. XIAO Y, LIU J, PENG Y et al. GSTA3 Attenuates Renal Interstitial Fibrosis by Inhibiting TGF-Beta-Induced Tubular Epithelial-Mesenchymal Transition and Fibronectin Expression. *PloS one* 2016; **11**:e0160855.
  165. MENG L, RIJNTJES E, SWARTS H et al. Dietary-Induced Chronic Hypothyroidism Negatively Affects Rat Follicular Development and Ovulation Rate and Is Associated with Oxidative Stress. *Biology of reproduction* 2016; **94**:90.
  166. HAYES JD , PULFORD DJ The glutathione S-transferase supergene family: regulation of GST and the contribution of the isoenzymes to cancer chemoprotection and drug resistance. *Critical reviews in biochemistry and molecular biology* 1995; **30**:445-600.
  167. FLOGEL U, GODECKE A, KLOTZ LO et al. Role of myoglobin in the antioxidant defense of the heart. *FASEB journal : official publication of the Federation of American Societies for Experimental Biology* 2004; **18**:1156-8.
  168. TUNSTER SJ, CREETH HDJ , JOHN RM The imprinted Phlda2 gene modulates a major endocrine compartment of the placenta to regulate placental demands for maternal resources. *Developmental biology* 2016; **409**:251-260.
  169. JIN F, QIAO C, LUAN N et al. Lentivirus-mediated PHLDA2 overexpression inhibits trophoblast proliferation, migration and invasion, and induces apoptosis. *International journal of molecular medicine* 2016; **37**:949-57.
  170. YU J, LU Y, LI Y et al. Role of S100A1 in hypoxia-induced inflammatory response in cardiomyocytes via TLR4/ROS/NF-kappaB pathway. *The Journal of pharmacy and pharmacology* 2015; **67**:1240-50.
  171. SAKAMOTO A , SUGAMOTO Y Identification of a novel aldose reductase-like gene upregulated in the failing heart of cardiomyopathic hamster. *Molecular and cellular biochemistry* 2011; **353**:275-81.
  172. XIONG W, QIU SY, XU LY et al. Effects of intermedin on dorsal root ganglia in the transmission of neuropathic pain in chronic constriction injury rats. *Clinical and experimental pharmacology & physiology* 2015; **42**:780-7.
  173. KOLTAI T Clusterin: a key player in cancer chemoresistance and its inhibition. *OncoTargets and therapy* 2014; **7**:447-56.
  174. SANSANWAL P, LI L , SARWAL MM Inhibition of intracellular clusterin attenuates cell death in nephropathic cystinosis. *Journal of the American Society of Nephrology : JASN* 2015; **26**:612-25.
  175. LIN CC, TSAI P, SUN HY et al. Apolipoprotein J, a glucose-upregulated molecular chaperone, stabilizes core and NS5A to promote infectious hepatitis C virus virion production. *Journal of hepatology* 2014; **61**:984-93.
  176. UTHEIM TP, SALVANOS P, UTHEIM OA et al. Transcriptome Analysis of Cultured Limbal Epithelial Cells on an Intact Amniotic Membrane following Hypothermic Storage in Optisol-GS. *Journal of functional*

biomaterials 2016; **7**.

177. ANTOGNELLI C, PALUMBO I, ARISTEI C et al. Glyoxalase I inhibition induces apoptosis in irradiated MCF-7 cells via a novel mechanism involving Hsp27, p53 and NF-kappaB. *British journal of cancer* 2014; **111**:395-406.
178. SARTO C, BINZ PA, MOCARELLI P Heat shock proteins in human cancer. *Electrophoresis* 2000; **21**:1218-26.
179. PARCELLIER A, SCHMITT E, GURBUXANI S et al. HSP27 is a ubiquitin-binding protein involved in I-kappaBalpha proteasomal degradation. *Molecular and cellular biology* 2003; **23**:5790-802.
180. HERDER C, DE LAS HERAS GALA T, CARSTENSEN-KIRBERG M et al. Circulating Levels of Interleukin 1- Receptor Antagonist and Risk of Cardiovascular Disease: Meta-Analysis of Six Population-Based Cohorts. *Arteriosclerosis, thrombosis, and vascular biology* 2017; **37**:1222-1227.
181. ZAND B, PREVIS RA, ZACHARIAS NM et al. Role of Increased n-acetylaspartate Levels in Cancer. *Journal of the National Cancer Institute* 2016; **108**:djv426.
182. WANG Z, CAO CJ, HUANG LL et al. EFEMP1 promotes the migration and invasion of osteosarcoma via MMP-2 with induction by AEG-1 via NF-kappaB signaling pathway. *Oncotarget* 2015; **6**:14191-208.
183. YAN L, LI Q, YANG J et al. TPX2-p53-GLIPR1 regulatory circuitry in cell proliferation, invasion, and tumor growth of bladder cancer. *Journal of cellular biochemistry* 2018; **119**:1791-1803.
184. WU MM, LI CF, LIN LF et al. Promoter hypermethylation of LGALS4 correlates with poor prognosis in patients with urothelial carcinoma. *Oncotarget* 2017; **8**:23787-23802.
185. ARIKAWA T, SIMAMURA E, SHIMADA H et al. Expression pattern of Galectin 4 in rat placentation. *Placenta* 2012; **33**:885-7.
186. MUTO M, FUJIHARA Y, TOBITA T et al. Lentiviral Vector-Mediated Complementation Restored Fetal Viability but Not Placental Hyperplasia in Plac1-Deficient Mice. *Biology of reproduction* 2016; **94**:6.
187. YANG X, LI Y, LI L et al. SnoRNAs are involved in the progression of ulcerative colitis and colorectal cancer. *Digestive and liver disease : official journal of the Italian Society of Gastroenterology and the Italian Association for the Study of the Liver* 2017; **49**:545-551.
188. YOSHIDA K, TODEN S, WENG W et al. SNORA21 - An Oncogenic Small Nucleolar RNA, with a Prognostic Biomarker Potential in Human Colorectal Cancer. *EBioMedicine* 2017; **22**:68-77.
189. PAN YZ, ZHOU A, HU Z et al. Small nucleolar RNA-derived microRNA hsa-miR-1291 modulates cellular drug disposition through direct targeting of ABC transporter ABCC1. *Drug metabolism and disposition: the biological fate of chemicals* 2013; **41**:1744-51.
190. PERRETTI M, D'ACQUISTO F Annexin A1 and glucocorticoids as effectors of the resolution of inflammation. *Nature reviews Immunology* 2009; **9**:62-70.
191. ZHANG Q, RAHIM MM, ALLAN DS et al. Mouse Nkrp1-Clr gene cluster sequence and expression analyses reveal conservation of tissue-specific MHC-independent immunosurveillance. *PloS one* 2012; **7**:e50561.
192. PARK OH, PARK J, YU M et al. Identification and molecular characterization of cellular factors required for glucocorticoid receptor-mediated mRNA decay. *Genes & development* 2016; **30**:2093-2105.
193. MATSUMOTO M, KANOUCHE H, SUZUKI K et al. Purification and characterization of perchloric acid soluble protein from rat lung. *Comparative biochemistry and physiology Part B, Biochemistry & molecular biology* 2003; **135**:255-62.
194. MANTUANO E, AZMOON P, BRIFALTO C et al. Tissue-type plasminogen activator regulates macrophage activation and innate immunity. *Blood* 2017; **130**:1364-1374.
195. MICHAEL JV, WURTZEL JGT, MAO GF et al. Platelet microparticles infiltrating solid tumors transfer miRNAs

- that suppress tumor growth. *Blood* 2017; **130**:567-580.
196. WANDERNOTH PM, MANNOWETZ N, SZCZYRBA J et al. Normal Fertility Requires the Expression of Carbonic Anhydrases II and IV in Sperm. *The Journal of biological chemistry* 2015; **290**:29202-16.
197. ZHANG X, WEISSMAN SM , NEWBURGER PE Long intergenic non-coding RNA HOTAIRM1 regulates cell cycle progression during myeloid maturation in NB4 human promyelocytic leukemia cells. *RNA biology* 2014; **11**:777-87.
198. SCHLAKE T , BOEHM T Expression domains in the skin of genes affected by the nude mutation and identified by gene expression profiling. *Mechanisms of development* 2001; **109**:419-22.
199. BERLETCH JB, DENG X, NGUYEN DK et al. Female bias in Rhox6 and 9 regulation by the histone demethylase KDM6A. *PLoS genetics* 2013; **9**:e1003489.
200. JANER A, ANTONICKA H, LALONDE E et al. An RMND1 Mutation causes encephalopathy associated with multiple oxidative phosphorylation complex deficiencies and a mitochondrial translation defect. *American journal of human genetics* 2012; **91**:737-43.
201. MOUTA CARREIRA C, LAVALLEE TM, TARANTINI F et al. S100A13 is involved in the regulation of fibroblast growth factor-1 and p40 synaptotagmin-1 release in vitro. *The Journal of biological chemistry* 1998; **273**:22224-31.
202. STURCHLER E, COX JA, DURUSSEL I et al. S100A16, a novel calcium-binding protein of the EF-hand superfamily. *The Journal of biological chemistry* 2006; **281**:38905-17.
203. WILSON JA, PROW NA, SCHRODER WA et al. RNA-Seq analysis of chikungunya virus infection and identification of granzyme A as a major promoter of arthritic inflammation. *PLoS pathogens* 2017; **13**:e1006155.
204. FALCO G, LEE SL, STANGHELLINI I et al. Zscan4: a novel gene expressed exclusively in late 2-cell embryos and embryonic stem cells. *Developmental biology* 2007; **307**:539-50.
205. STORM MP, KUMPFMUELLER B, BONE HK et al. Zscan4 is regulated by PI3-kinase and DNA-damaging agents and directly interacts with the transcriptional repressors LSD1 and CtBP2 in mouse embryonic stem cells. *PloS one* 2014; **9**:e89821.
206. ZALZMAN M, FALCO G, SHAROVA LV et al. Zscan4 regulates telomere elongation and genomic stability in ES cells. *Nature* 2010; **464**:858-63.
