# Supplementary material for: Anti-apoptotic Regulation Contributes to the Successful Nuclear Reprogramming Using Cryopreserved Oocytes
Source: PubMed Central journal article supplement — Stem Cell Reports. 2019 Feb 21;12(3):545–56. doi: 10.1016/j.stemcr.2019.01.019 (PMC6411484; doi:10.1016/j.stemcr.2019.01.019), 2019-02-21
Supplement: mmc4.pdf [file mmc4.pdf]

# Anti-apoptotic Regulation Contributes to the Successful Nuclear Reprogramming Using Cryopreserved Oocytes

Ah Reum Lee,<sup>1,5</sup> Kwonho Hong,<sup>2,5</sup> Seo Hye Choi,<sup>1</sup> Chanhyeok Park,<sup>2</sup> Jae Kyun Park,<sup>3</sup> Jin Il Lee,<sup>3</sup> Jae Il Bang,<sup>1</sup> Dong-Won Seol,<sup>1</sup> Jeoung Eun Lee,<sup>4</sup> and Dong Ryul Lee<sup>1,4,\*</sup>

<sup>1</sup>Department of Biomedical Science, College of Life Science, CHA University, 335 Pankyo-ro, Seongnam-si, Gyeonggi-do, 13488 Seoul, Korea

<sup>2</sup>Department of Stem Cell and Regenerative Biotechnology, Konkuk University, Seoul, Korea

<sup>3</sup>Fertility Center of CHA Gangnam Medical Center, College of Medicine, CHA University, Seoul, Korea

<sup>4</sup>CHA Stem Cell Institute, CHA University, Seongnam, Korea

<sup>5</sup>Co-first author

\*Correspondence: [drleedr@cha.ac.kr](mailto:drleedr@cha.ac.kr)

<https://doi.org/10.1016/j.stemcr.2019.01.019>

## SUMMARY

Cryopreservation has a negative effect on the quality of oocytes and may be closely associated with increased levels of reactive oxygen species (ROS) and apoptotic events. The purpose of the present study was to evaluate the detrimental effects on the developmental competence of somatic cell nuclear transferred (SCNT) mouse embryos using vitrified (cryopreserved) oocytes and to evaluate the recovery effects of melatonin on cryo-damage in cloned embryos. Development of SCNT embryos using cryopreserved oocyte cytoplasm (SCNT-CROC) was inferior to those using fresh cytoplasm (SCNT-FOC). Using RNA-sequencing analysis, we found upregulation of eight pro-apoptotic-related genes (*Cyct*, *Dapk2*, *Dffb*, *Gadd45g*, *Hint2*, *Mien1*, *P2rx7*, and *Pmaip*) in the SCNT-CROC group. Furthermore, the addition of melatonin, an agent that reduces apoptosis and ROS production, enhanced blastocyst formation rates in the SCNT-CROC group when compared with the melatonin-untreated group. Additionally, melatonin treatment increased the derivation efficiency of pluripotent stem cells from cloned embryos using cryopreserved oocyte.

## INTRODUCTION

It has been suggested that somatic cell nuclear transfer (SCNT)-based reprogramming and subsequent derivation of embryonic stem cells (ESCs) can produce patient-specific stem cells for regenerative medicine (Lanza et al., 1999). Recently, three individual research groups have successfully derived several SCNT-ESC lines using good-quality human oocytes and fibroblast cells from various sources (Chung et al., 2014; Tachibana et al., 2013; Yamada et al., 2014). In addition, many of the developmental blocks in human SCNT embryos have been partially overcome by modulation of histone methylation (Chung et al., 2015) and are now an applicable technology for cell therapy.

Recently, oocyte vitrification has been used as a practical tool in human assisted reproductive technology as well as a popular cryopreservation method. In fact, it was reported that cytogenetic and developmental deficits in offspring born from vitrified (cryopreserved) oocytes were not increased when compared with conventional *in vitro* fertilization (Practice Committees of American Society for Reproductive Medicine and Society for Assisted Reproductive Technology, 2013). This technique provides a valuable opportunity to preserve fertility for infertile women, to treat fertile women at risk of age-induced fertility decline (Zhang et al., 2016) and cancer therapy-induced threats to fertility (Falcone et al., 2004). In addition, vitrification of surplus human oocytes could provide a steady source of eggs for research, such as SCNT, and its use also reduces

ethical concerns (Baek et al., 2017). However, although cryopreserved mouse oocytes can support genomic reprogramming of the somatic cell nucleus to permit full-term development, developmental potential of the SCNT embryos was very poor (Hirata et al., 2011). In particular, production of cloned embryos using cryopreserved human oocytes and derivation of their SCNT-ESC lines was not achieved until recently. Even with a survival rate greater than 90%, clinical outcomes from vitrified oocytes are lower than from fresh oocytes in the human assisted reproductive technology program (Nakagata et al., 2013). This is suggested to be due to cytoskeletal damage (Hotamisligil et al., 1996), altered spindle structure (Joly et al., 1992), microtubules (Van der Elst et al., 1992), cortical granule distribution (Gook et al., 1993; Van Blerkom and Davis, 1994), and zonal hardening of oocytes (Chen et al., 2000; Kazem et al., 1995). Additionally, cryopreserved oocytes are particularly vulnerable to oxidative stress because of their high levels of lipids, and generate large amounts of reactive oxygen species (ROS) that influence the balance between oxidation and reduction reactions and the intracellular anti-oxidative system (Luberda, 2005; Nakamura et al., 2011).

Melatonin is a secretory product of the pineal gland and regulates circadian rhythmicity (Reiter et al., 2003), aging (Tamura et al., 2017), immune function (Calvo et al., 2013), and apoptosis (Wei et al., 2015). It has been increasingly recognized for its anti-oxidant capacity (Manchester et al., 2015; Reiter et al., 2016; Zhang and Zhang, 2014).

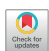

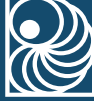**Table 1. Effect of *Kdm4a* mRNA Injection on the Developmental Potential of Cloned Embryos from Cryopreserved Mouse Oocytes**

| Group         | mRNA ( $\mu\text{g}/\mu\text{L}$ ) | No. of NT Oocytes | No. of 2-Cell Embryos (%) <sup>a</sup> | No. of 4-Cell Embryos (%) <sup>b</sup> | No. of 2-Cell Block Embryos (% $\pm$ SEM) <sup>b</sup> | No. of Blastocysts (% $\pm$ SEM) <sup>b</sup> |
|---------------|------------------------------------|-------------------|----------------------------------------|----------------------------------------|--------------------------------------------------------|-----------------------------------------------|
| SCNT-FOC      | –                                  | 112               | 105 (94)                               | 70 (67)                                | 35 (33 $\pm$ 2.9) <sup>a</sup>                         | 27 (26 $\pm$ 3.4) <sup>a</sup>                |
| SCNT-FOC + K  | 2                                  | 109               | 103 (95)                               | 102 (99)                               | 1 (1 $\pm$ 1) <sup>b</sup>                             | 85 (83 $\pm$ 3.5) <sup>b</sup>                |
| SCNT-CROC     | –                                  | 139               | 132 (95)                               | 93 (70)                                | 39 (30 $\pm$ 1.8) <sup>a</sup>                         | 30 (23 $\pm$ 3.1) <sup>a</sup>                |
| SCNT-CROC + K | 2                                  | 130               | 125 (96)                               | 123 (98)                               | 2 (2 $\pm$ 1.2) <sup>b</sup>                           | 82 (66 $\pm$ 2.4) <sup>c</sup>                |

SCNT-FOC, cloned embryos from somatic cell nuclear transfer using fresh oocyte cytoplasm; SCNT-CROC, cloned embryos from somatic cell nuclear transfer using cryopreserved (vitrified/warmed) oocyte cytoplasm; K, injection of lysine (K)-specific demethylase 4A (*Kdm4a*) mRNA. Within the same column, values with different superscript letters (a, b, c) are significantly different ( $p < 0.05$ ;  $n = 5$ ).

<sup>a</sup>Based on the number of SCNT oocytes.

<sup>b</sup>Based on the number of 2-cell embryos.

In the field of reproductive biology, several recent studies have shown that melatonin improves age-induced fertility decline, attenuates ovarian mitochondrial oxidative stress (Song et al., 2016), and promotes oocyte maturation (Tian et al., 2014). Also, melatonin improves oocyte quality and embryonic development in sheep (Abecia et al., 2002), pigs (Shi et al., 2009), bovine species (Papis et al., 2007), mice (Ishizuka et al., 2000), and humans (Arjmand et al., 2016). Moreover, supplementation of melatonin enhanced embryonic development, improving the quality of SCNT blastocysts and reducing the apoptosis rate in porcine (Choi et al., 2008; Nakano et al., 2012; Pang et al., 2013), bovine (Su et al., 2015), and mouse embryos (Salehi et al., 2014).

In the present study, we primarily explored the effect of vitrified oocyte cytoplasm on the outcome of SCNT-mediated reprogramming. By modulation of histone methylation, a developmental block was overcome in cloned embryos derived from both cryopreserved and fresh oocytes; however, the developmental capacity was greater in those from fresh oocytes. This deficit in embryonic development can be partly recovered by addition of melatonin during cultivation *in vitro*, as shown in cloned embryos derived from fresh oocytes. In fact, supplementation of melatonin may positively affect the quality of cloned embryos by regulating gene expression and apoptotic processes.

## RESULTS

### Injection of *Kdm4a* mRNA Enhanced Embryonic Development of Cloned Embryos Using Vitrified/Warmed Oocytes, but Did Not Fully Reach that of Fresh Oocytes

In our previous study, mRNA injection of *Kdm4a* encoding the H3K9me3 demethylase overcame a developmental block of SCNT mammalian eggs and improved their embryonic development (Chung et al., 2015). To analyze

the effect of *Kdm4a* mRNA on the development of cloned embryos using cytoplasm of vitrified/warmed oocytes, we assessed their embryonic development after injections with or without *Kdm4a* mRNA. The injection of *Kdm4a* mRNA removed H3K9me3 activity (Figure S1) and overcame the 2-cell block in the cloned embryos (Table 1). In fact, downregulation of H3K9me3 activity highly improved blastocyst formation rates in both cloned embryos using fresh (SCNT-FOC) and cryopreserved oocyte cytoplasm (SCNT-CROC). Interestingly, although developmental block was nearly overcome after *Kdm4a* mRNA injection in both groups, embryonic development and the quality of blastocysts from the SCNT-CROC group was still lower than those of the SCNT-FOC group (Figure 1 and Table 1). As shown Figure 1C, the number of cloned embryos showing a high ratio of inner cell mass (ICM) number (more than 10 ICMs per blastocyst) was lower in the SCNT-CROC + K group than in the SCNT-FOC + K group ( $p < 0.05$ ).

### Analysis of Transcriptional Differences in Cloned 2-Cell Embryos between SCNT-FOC and SCNT-CROC Groups

To identify the earliest embryonic transcriptional differences between SCNT-FOC and SCNT-CROC groups, we performed RNA-sequencing (RNA-seq) experiments with pooled 2-cell embryos (100 embryos per sample, repeated three times) of both groups 24 h after oocyte activation and *Kdm4a* mRNA injection. The expression of most genes was similar in both groups, and only a small number of genes (159 genes) were shown to have different expression patterns (Figure 2A). From gene ontology (GO) terms and KEGG analysis, we found that several pathways, including apoptosis and p53 signaling pathways, were markedly activated. When the differentially expressed genes (DEGs) in the GO-term database were analyzed, out of 1,730 apoptosis-related genes only 16 genes (0.92%) showed greater than a 3-fold difference between SCNT-FOC and

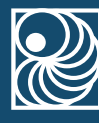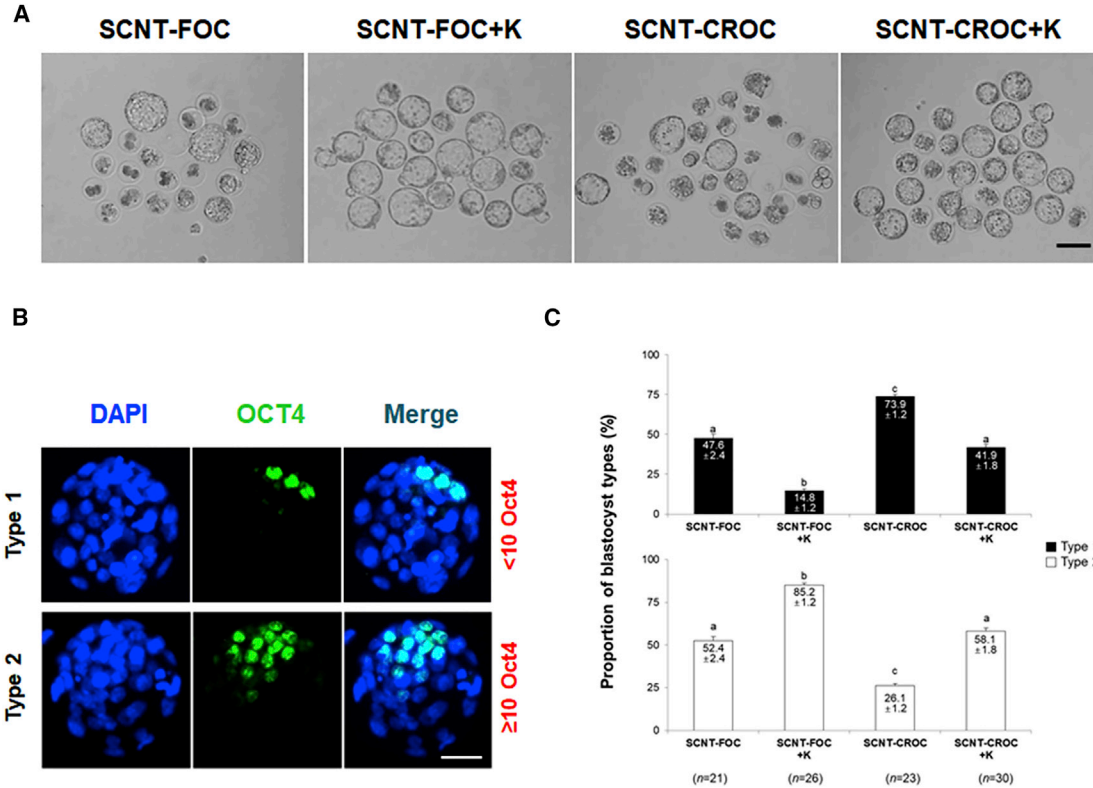

**Figure 1. Injection of *Kdm4a* mRNA Improved the Embryonic Development of SCNT Embryos Using Fresh Oocyte Cytoplasm and Cryopreserved Oocyte Cytoplasm**

(A) Blastocyst formation in SCNT embryos using fresh oocyte cytoplasm (SCNT-FOC) and cryopreserved oocyte cytoplasm (SCNT-CROC) groups with and without *Kdm4a* mRNA injection (K). Scale bar, 20  $\mu$ m.

(B) Expression of OCT4 and DAPI staining of blastocysts derived from SCNT-FOC and SCNT-CROC groups with or without *Kdm4a* mRNA injection (K). Scale bar, 20  $\mu$ m.

(C) The proportion of SCNT-derived blastocysts based on the numbers of inner cell mass (ICM) and expressed immunoreactivity for OCT4. Type 1, the types of blastocysts containing more than 10 ICM cells; type II, the types of blastocysts containing fewer than 10 ICM cells. The results in the bars are presented as means  $\pm$  SEM. The different letters on the bars indicate significantly different values ( $p < 0.05$ ).

SCNT-CROC groups. Interestingly, in the SCNT-CROC group, eight (50%) pro-apoptosis-related genes (*Cyct*, *Dapk2*, *Dffb*, *Gadd45g*, *Hint2*, *Mien1*, *P2rx7*, and *Pmaip*) and three (27.2%) anti-apoptotic genes (*Adrb2*, *Scin*, and *Six1*) were upregulated when compared with the SCNT-FOC group. Also, only two (18.2%) pro-apoptosis-related genes (*Ifng* and *Siah1a*) and three (27.2%) anti-apoptotic genes (*Syce3*, *Tsc22d3*, and *Vegfa*) were downregulated (Figure 2B).

In addition, only six cell-cycle-related genes (0.41% out of 1,449 genes) had different expression levels and only one cell arrest-related gene (*Gadd45g*) was upregulated in the SCNT-CROC group (Figure 2B).

On the other hand, 30 gene expression-related genes (0.62% out of 4,841 genes) and 61 metabolic process-related genes (0.60% out of 10,234 genes) showed different expression between SCNT-FOC and SCNT-CROC groups.

However, most of them have no negative function on gene expression or metabolic process (Figure 2B).

### Melatonin Enhances Embryonic Development of Cloned Embryos Using Vitrified/Warmed Oocytes

Due to the low rate of embryonic development up to the blastocyst stage and different expressions of apoptotic genes in the SCNT-CROC group, we applied 10  $\mu$ M melatonin to the culture system of cloned embryos to improve their quality. The concentration of melatonin resulting in the best quality and a high blastocyst formation rate was selected from a preliminary experiment using conventionally fertilized mouse embryos (data not shown). As shown in several studies (Gao et al., 2012; Liang et al., 2017; Zhao et al., 2016), supplementation of melatonin during cultivation reduced ROS levels and the number of TUNEL-positive cells in blastocysts from the SCNT-CROC group (Figure 3).

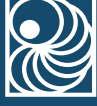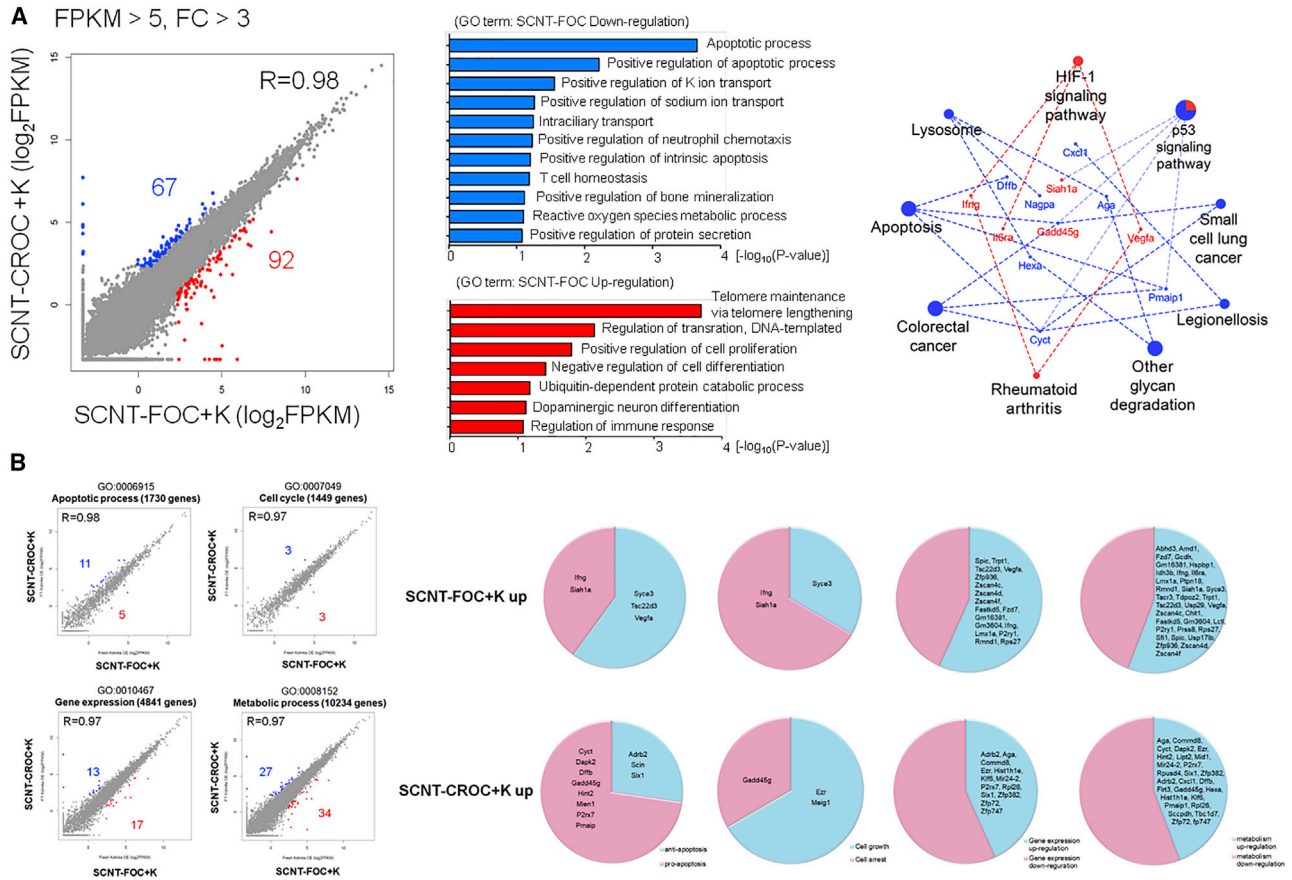

**Figure 2. Analysis of Gene Expressions Between SCNT-CROC + K and SCNT-FOC + K Groups**  
 (A) (Left) Scatterplot showing upregulated (red) and downregulated (blue) genes in SCNT-FOC. FPKM > 5 and FC > 3 is used as a cutoff value. (Center) Bar graph showing GO terms with upregulated (red) or downregulated (blue) genes in SCNT-FOC. (Right) KEGG pathway analysis using the DEGs. Red and blue color in pie charts represent ratio of genes repressed (blue) and enhanced (red) in SCNT-FOC.  
 (B) DEGs are compared with each GO dataset and then classified into four groups by apoptotic process, cell cycle, gene expression, and metabolic process.

The overall percentage of TUNEL-positive embryos were significantly decreased in the melatonin-supplemented group (SCNT-CROC + K + M) compared with those of the non-supplemented group (SCNT-CROC and SCNT-CROC + K) (7.8% versus 54.3% and 24.1%,  $p < 0.05$ ; Figures 3A and 3B). In addition, melatonin has a positive role on the reduction of ROS levels and in the embryonic development of the SCNT-CROC group, regardless of *Kdm4a* mRNA injection (Table 2). To compare the embryonic quality of cloned embryos with or without supplementation of melatonin, we analyzed the implantation rate after embryo transfer and the derivation rate of mouse ESCs (mESCs). The number of implantation rates in the melatonin-supplemented group (SCNT-CROC + K + M) was significantly increased compared with those of the non-supplemented group (SCNT-CROC + K) (66.2% [51/77] versus 42.9% [33/77],  $p < 0.05$ ; Figures 4A and S2). Also, we obtained a higher derivation rate of mESCs in the melatonin-supple-

mented group compared with those in the non-supplemented group (21.3% [10/47] versus 5.6% [2/36],  $p < 0.05$ ; Figure 4B).

### Effect of Melatonin Treatment on Transcription in Cloned Blastocysts from the SCNT-CROC Group

To find which genes are regulated by melatonin, we analyzed transcripts from 2-cell embryos and blastocysts (50 embryos or blastocysts per sample, repeated two times) in both melatonin-treated and -non-treated groups. In comparison of 2-cell embryos, 175 genes were considered differentially expressed at a fold change (FC) > 5 and fragments per kilobase per million reads (FPKM) > 5 (Figure 5 and Table S1). In the melatonin-treated (SCNT-CROC + K + M) group, 111 genes were upregulated compared with the melatonin-non-treated (SCNT-CROC + K) group. GO-term and KEGG pathway analysis revealed that the addition of melatonin ameliorates cell



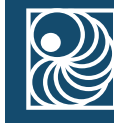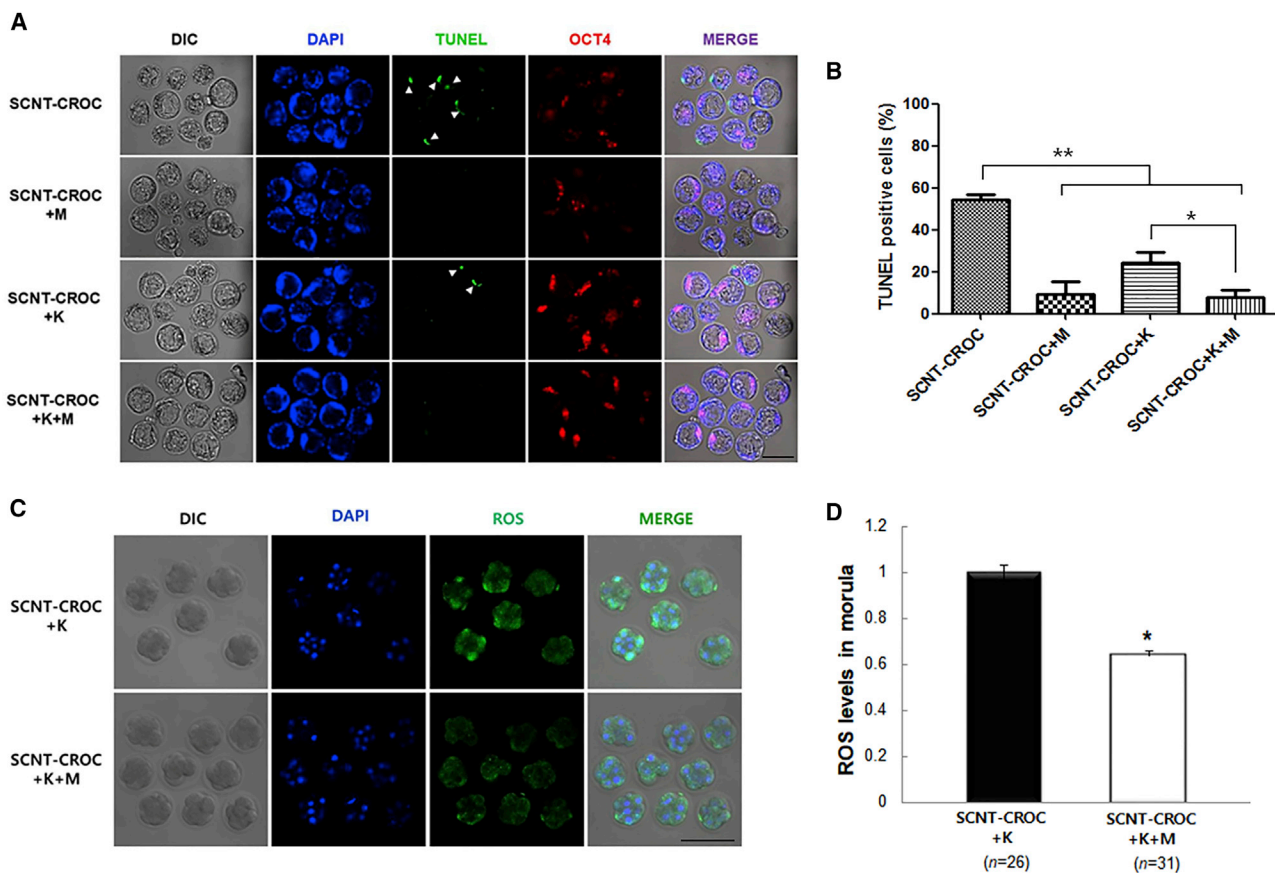

**Figure 3. Effects of *Kdm4a* mRNA Injection (K) and/or Melatonin Treatment (M, 10  $\mu$ M) on Apoptosis and ROS Levels in SCNT Embryos Using Cryopreserved Oocyte Cytoplasm**

(A) Immunostaining of cloned blastocysts in the SCNT-CROC group after various treatments. The nuclei (blue) are stained with DAPI, and the TUNEL-positive apoptotic nuclei (green) are indicated by arrows. OCT4 staining (red) is indicated ICM. Scale bar, 100  $\mu$ m.

(B) TUNEL-positive cells indicate each embryo with apoptotic cells. \*\* $p < 0.05$ , significantly different from SCNT-CROC group; \* $p < 0.05$ , significantly different from SCNT-CROC + K group (n = 4).

(C) ROS staining (green) of cloned morula in the SCNT-CROC group after various treatments. Scale bar, 100  $\mu$ m.

(D) Quantification of ROS fluorescence intensity of cloned morula in the SCNT-CROC group after various treatments. The experiments were performed four times. In each replicate, n = 6–9 per group. The total number of embryos was 26 and 31 in the SCNT-CROC + K and SCNT-CROC + M + K groups, respectively. Asterisk indicates significantly different value ( $p < 0.05$ ).

death-related pathways such as apoptosis, peroxisome, and oxidative phosphorylation (Figure 5). Notably, *Deaf1*, *Fxn*, *Ppan*, *Rab10os*, *Sprr2d*, *Stag3*, *Tsen15*, and *Zfp335*, which are involved in cell survival and tissue regeneration, were upregulated in 2-cell embryos from the SCNT-CROC + K + M group. In addition, *Ctss*, *Dffa*, *Eif3f*, *Hacl1*, *Hspbp1*, *Mob2*, *Mrpl23*, *Mrpl33*, *Pmvk*, *Slc4a11*, and *Wbscr22*, which are involved in anti-oxidant function, inflammation, and apoptosis, were also highly upregulated. In contrast, the expression of cell death and degeneration-related genes (*Atp6v0c*, *Cd52*, *Dapk2*, *Ddit4l*, *Duoxa2*, *Nfkbia*, *Ptgds*, *Rdh12*, and *Rnd3*) were downregulated in 2-cell embryos from the SCNT-CROC + K + M group (Table S1).

As shown in the Table S2, in comparison of blastocysts, 81 genes were considered differentially expressed at a FC > 2 and FPKM > 5. In the melatonin-treated (SCNT-CROC + K + M) group, 20 genes were upregulated compared with the melatonin-non-treated (SCNT-CROC + K) group. Notably, *Amd1*, *Fam46C*, *Oxt*, and *Ppt2*, which are involved in cell survival and tissue regeneration, were upregulated in blastocysts from the SCNT-CROC + K + M group. In addition, *Gulo* and *Txnip*, which are involved in anti-oxidant function, inflammation, and apoptosis, were also highly upregulated.

In contrast, the expression of many oxidative stress-related genes (*Adh1*, *Car2*, *Gsta3*, *Gstm2*, *Mb*, *Phlda2*, and *S100a1*) and cell death and degeneration-related genes



**Table 2. Effect of *Kdm4a* mRNA Injection and Melatonin Supplement on the Developmental Potential in Cloned Embryos of Cryopreserved Mouse Oocytes**

| Group             | Melatonin (μM) | No. of NT Oocytes | No. of 2-Cell Embryos (%) <sup>a</sup> | No. of 4-Cell Embryos (%) <sup>b</sup> | No. of 2-Cell Block Embryos (% ± SEM) <sup>b</sup> | No. of Blastocysts (% ± SEM) <sup>b</sup> |
|-------------------|----------------|-------------------|----------------------------------------|----------------------------------------|----------------------------------------------------|-------------------------------------------|
| SCNT-CROC         | –              | 125               | 112 (90)                               | 66 (59)                                | 46 (42 ± 3.7) <sup>a</sup>                         | 23 (20 ± 1.5) <sup>a</sup>                |
| SCNT-CROC + M     | 10             | 125               | 114 (91)                               | 81 (71)                                | 33 (31 ± 3.7) <sup>a</sup>                         | 44 (39 ± 1.2) <sup>b</sup>                |
| SCNT-CROC + K     | –              | 138               | 128 (98)                               | 124 (94)                               | 4 (3 ± 1.5) <sup>a</sup>                           | 76 (59 ± 3.3) <sup>a</sup>                |
| SCNT-CROC + K + M | 10             | 138               | 123 (96)                               | 119 (96)                               | 4 (4 ± 1.8) <sup>a</sup>                           | 91 (75 ± 3.3) <sup>b</sup>                |

SCNT-CROC, cloned embryos from somatic cell nuclear transfer using cryopreserved (vitrified/warmed) oocyte cytoplasm; M, treatment of melatonin; K, injection of lysine (K)-specific demethylase 4A (*Kdm4a*) mRNA (2 μg/μL). Within the same column, values with different superscript letters (a, b) are significantly different (p < 0.05; n = 5).

<sup>a</sup>Based on the number of SCNT oocytes.

<sup>b</sup>Based on the number of 2-cell embryos.

(*Akr1c13*, *Amd2*, *Clu*, *Hist1h3a*, *Hspb1*, *Il1m*, and *Nat8*) were downregulated in blastocysts from the SCNT-CROC + K + M group. Also, many cell and tumor proliferation-related genes (*Efemp1*, *Glpr1*, *Lgals4*, *Plac1*, *Snora15*, *Snora 21*, *Snora 34*, and *Anxa1*) were shown to have decreased expression levels. Moreover, some immune response-related genes (*Clec2f*, *Hrspr12*, and *Plat*) were also shown to be downregulated in the melatonin-treated group (Table S2).

## DISCUSSION

During the last decade, three types of pluripotent stem cells (PSCs), including SCNT-ESCs, induced PSCs (iPSCs), and multipotent germline stem cells, have been established using mouse and human cells, and these technologies may provide a prominent approach for the treatment of patients with incurable diseases as well as for improving the quality of life for the aging population (Chung et al., 2014; Kanatsu-Shinohara et al., 2004; Tachibana et al., 2013; Takahashi et al., 2007). In addition, the establishment of PSC banks with various homozygous HLA types may accelerate the clinical application of stem cell therapy and the development of stem cell businesses (Lee et al., 2016; Taylor et al., 2012). Recently, several reports have suggested that the merits of SCNT-ESCs include improved genetic stability and non-transmission of mitochondrial disease compared with iPSCs (Kang et al., 2016; Ma et al., 2014). Beyond these promising applications, SCNT-ESC technologies may help solve the supply problem of human donated oocytes required for the establishment of PSCs. In the present study, we analyzed the developmental capacity of cloned embryos using vitrified oocytes in order to secure a supply of oocytes. The embryonic development of cloned mouse embryos using vitrified oocyte cytoplasm (SCNT-CROC) was decreased and the development was not fully recovered by recent SCNT technology. By RNA-seq anal-

ysis, we have evaluated that different expression in apoptosis- and cell-cycle-related genes were found in embryos from the SCNT-CROC group. Addition of melatonin, which has various positive anti-apoptotic and anti-oxidative stress effects during cultivation, was improved in the pre- and post-implantation development of cloned mouse embryos. Moreover, the expression of anti-apoptotic- and cell-survival-related genes was significantly upregulated in the melatonin-treated cloned embryos when compared with the non-treated group.

A high incidence of developmental block has been observed in cloned mammalian embryos and is a major reason for the low efficiency of SCNT technology (Yang et al., 2007). Several recent reports have suggested that persistence of specific histone methylation interrupts cellular reprogramming of donor nuclei and that addition of histone demethylase enhanced the cloning efficiency in mouse and human SCNT procedures (Chung et al., 2015; Matoba et al., 2014; Matoba and Zhang, 2018). In addition, it has been generally accepted that the vitrification procedure can maintain the developmental capacity of mammalian oocytes after cryopreservation and contribute to the preservation of female fertility (Practice Committees of American Society for Reproductive Medicine and Society for Assisted Reproductive Technology, 2013). However, some effects of cryo-injury still must be overcome in conventional and cloned embryos, even if various technologies are applied (Baek et al., 2017; Yang et al., 2016). To test whether increased histone demethylation has an effect on the recovery of diminished reprogramming potential mediated by cryo-injury, we injected *Kdm4a* mRNAs into cloned embryos. Similar to our previous reports, *Kdm4a* mRNAs overcame the developmental block in embryos from the SCNT-FOC and SCNT-CROC groups (Table 1). It is well known that *Oct4* is a specific gene marker for the ICM at the expanded blastocyst stage (Nichols et al., 1998; Strumpf et al., 2005). In the present

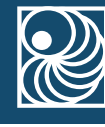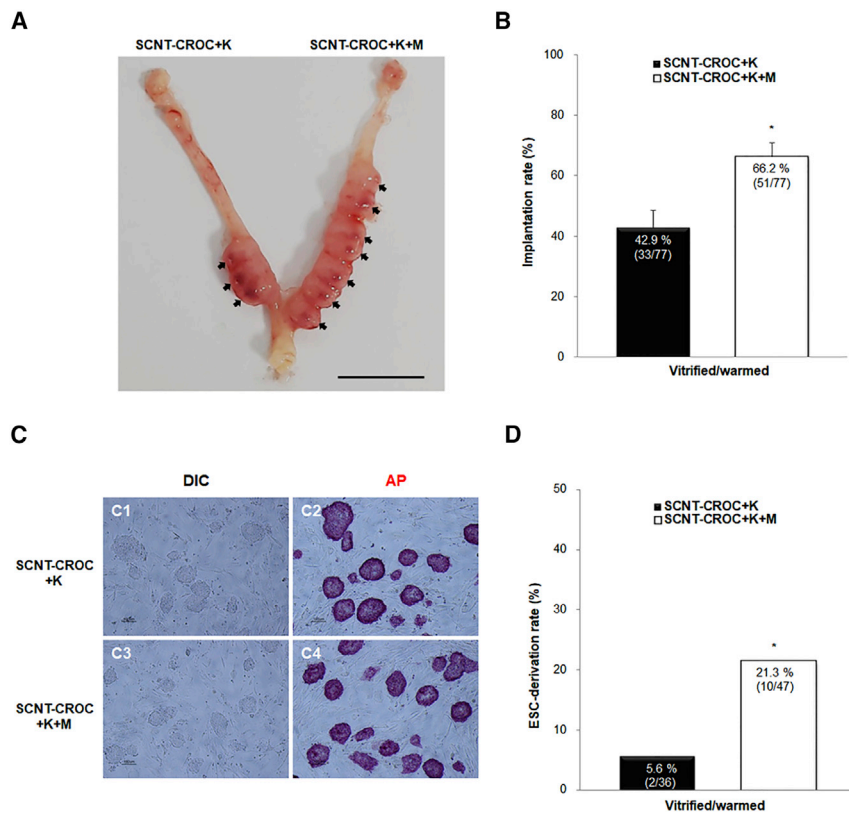

**Figure 4. Effects of *Kdm4a* mRNA Injection (K) and/or Melatonin Treatment (M, 10  $\mu$ M) on Implantation and SCNT-ESC Derivation from SCNT Embryos Using Cryopreserved Oocyte Cytoplasm**

(A) Photograph of representative uterus at day 7. The blastocysts from the SCNT-CROC + K were transferred into the left horn only and the blastocysts from the SCNT-CROC + K + M into the right horn. Embryo transfer was performed 11 times (see Figure S2).

(B) Comparison of implantation rate between blastocysts from the SCNT-CROC + K and SCNT-CROC + K + M groups.

(C) Photograph of ESCs from cloned embryos. C1 (bright-field picture) and C2 (alkaline phosphatase staining) represent colonies from melatonin-non-treated (SCNT-CROC + K) group. C3 (bright-field picture) and C4 (alkaline phosphatase staining) represent colonies from melatonin-treated (SCNT-CROC + K + M) group.

(D) Efficiency of SCNT-ESC derivation. The efficiency of SCNT-ESC derivation was analyzed based on the total number of blastocysts placed on mitotic inactivated MEF feeder cells. ESC derivation was performed three times.

study, to assess the quality of blastocysts, we evaluated ICM and total cell numbers (Kishigami et al., 2006). Although *Kdm4a* mRNA was injected, the number of ICM in the SCNT-FOC group (using fresh oocyte cytoplasm) was significantly higher than those in the SCNT-CROC group (Figure 1C). Also, a significant difference in developmental potential still remained in both SCNT-FOC and SCNT-CROC groups (Table 1), which suggests that cryo-injury is not fully overcome by this procedure.

We performed RNA-seq analysis to identify differential gene expression related to difference in embryonic development between the SCNT-FOC and SCNT-CROC groups. As shown in Figure 2, gene expression in both groups was similar except for a small number of genes. Of particular note were eight pro-apoptosis-related genes (*Cyct*, *Dapk2*, *Dffb*, *Gadd45g*, *Hint2*, *Mien1*, *P2rx7*, and *Pmaip*) and one cell-cycle arrest gene (*Gadd45g*) that were upregulated in the SCNT-CROC group (Figure 2). On the other hand, among the 30 gene expression-related genes (0.62% of 4,841 genes) and 61 metabolic process-related genes (0.60% of 10,234 genes) showing different expression in both SCNT-FOC and SCNT-CROC groups, we did not find any gene that downregulated their related functions. Based on these results, we hypothesized that cryo-injury during vitrification may upregulate apoptosis and downregulate

embryonic development. Melatonin, well known as an anti-apoptotic and scavenging agent in mammalian embryology (Reiter et al., 2016; Salehi et al., 2014), was able to improve the developmental competence of cloned embryos in the SCNT-CROC group.

Supplementation of melatonin into culture medium increased embryonic development regardless of *Kdm4a* mRNA injection but showed no effect on overcoming the developmental block (Table 2). Also, melatonin supplementation decreased apoptosis in cloned mouse embryos (Figure 3). GO-term and KEGG pathway analysis revealed that the addition of melatonin results in altered expression of genes related to terpenoid backbone biosynthesis, apoptosis, peroxisome, and oxidative phosphorylation, among others. The data suggest that melatonin may confer a beneficial effect on cell survival to SCNT-CROC. Therefore, combining melatonin supplementation and *Kdm4a* mRNA injection can provide a synergistic effect on the embryonic development of cloned embryos in the SCNT-CROC group. In addition, we analyzed implantation and the ESC derivation of cloned embryos from the SCNT-CROC group after melatonin supplementation. As shown in Figures 4A and S2, the number of implantation sites at embryonic day 7.5 was significantly increased in the melatonin-treated group. We also found that the derivation

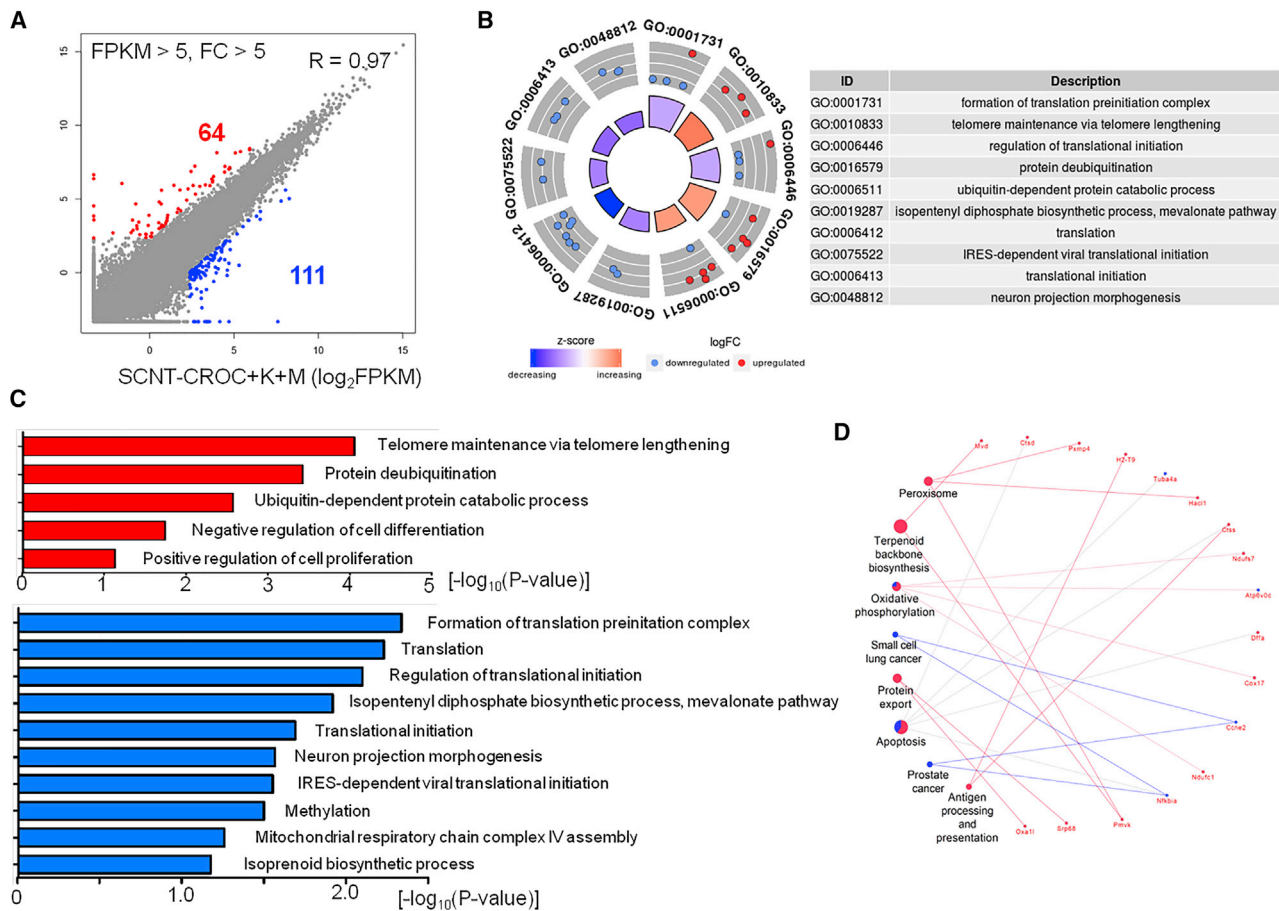

**Figure 5. Melatonin Confers a Beneficial Effect on Cell Survival to SCNT-CROC**

(A) Scatterplot showing alteration of gene expression by melatonin treatment. Red and blue dots represent genes repressed and enhanced by melatonin, respectively. FPKM > 5 and FC > 5 is used as cutoff value.

(B) GO-term analysis using both up- and downregulated genes in melatonin-treated SCNT-CROCs. Each red and blue dot in the GO terms represents a gene repressed and enhanced by melatonin, respectively.

(C) Bar graph showing GO terms with up- or downregulated genes in SCNT-CROC + K + M group. Red bars, analysis with downregulated genes; blue bars, analysis with upregulated genes.

(D) KEGG pathway analysis using all DEGs. Red and blue color in pie charts represent ratio of genes repressed (red) and enhanced (blue) by melatonin.

efficiency of SCNT-ESCs from cloned embryos using cryopreserved oocytes was improved after melatonin supplementation (Figure 4B). More interestingly, we found that the expression of some immune response-related genes (*Clec2f*, *Hrsp12*, and *Plat*) was downregulated following melatonin treatment in *in vitro* culture, and this downregulation may be related to the increased implantation rate (Table S1).

In the present study, we have found that the low developmental efficiency of cloned mouse embryos using cryopreserved oocytes may be due to increased apoptosis and altered gene expression resulting from cryo-injury. Therefore, this decreased developmental competence should be alleviated by the addition of a scavenger agent such as

melatonin. This system will also be helpful in the derivation and application of human SCNT-ESC lines by providing steady sources of oocytes, and may reduce the ethical concern related to oocyte donation.

## EXPERIMENTAL PROCEDURES

### Animals

Eight- to 10-week-old female B6D2F1 mice (Orient-Bio, Gyeonggi-do, Korea) were used for the collection of the recipient oocytes and as SCNT donors. Eight- to 10-week-old female ICR mice were used as the poster mothers of embryo transfer. To induce pseudopregnancy, these mice were mated with vasectomized male mice of the same strain. The protocols for the use of animals in these





studies were approved by the Institutional Animal Care and Use Committee (IACUC) of CHA University (Project no. IACUC-170119) and all experiments were carried out in accordance with the approved protocols.

### Oocyte Collection

Mice were superovulated by injecting them with 5 IU of pregnant mare serum gonadotropin (Sigma-Aldrich, St. Louis, MO), followed by 5 IU of human chorionic gonadotropin (hCG; Sigma-Aldrich) 48 h later. Oocytes were collected in M2 (Sigma-Aldrich) medium at 14 h after hCG injection, and cumulus cells were denuded with M2 medium containing 0.1% hyaluronidase (Sigma-Aldrich). The cumulus-free oocytes were then cultured in potassium simplex optimized medium (KSOM; Millipore, Darmstadt, Germany) for the experiment. Dispersed cumulus cells were removed by hyaluronidase treatment, diluted in M2 medium, and collected. The pellet was then resuspended in a small volume of 3% (v/v) polyvinylpyrrolidone (PVP) in M2 and kept at 4°C until use.

### Oocyte Vitrification and Warming

Quinn's Advantage Medium with HEPES (Sage, Malov, Denmark) with 20% (v/v) Knockout Serum Replacement (KSR; Gibco, Grand Island, NY) was used as the base medium for preparation of all vitrification and warming solutions. Two cryoprotectant agents, a combination of ethylene glycol (EG; Sigma-Aldrich) and dimethylsulfoxide (DMSO; Sigma-Aldrich) were used for the vitrification procedure. MII oocytes were pre-equilibrated with HEPES medium containing 7.5% EG and 7.5% DMSO for 2 min 30 s. Pre-equilibrated oocytes were then placed and equilibrated in the same volume of HEPES medium supplemented with 15% EG, 15% DMSO, and 0.5 M sucrose (Sigma-Aldrich) for 20 s. Equilibrated oocytes were loaded onto electron microscopic (EM) copper grids (EM Grid; PELCO, Redding, CA) and plugged into slush nitrogen (SN<sub>2</sub>) using Vit-master (IMT; Ness Ziona, Israel). Vitrified oocytes were stored in an LN<sub>2</sub> tank. For warming, vitrified oocytes were warmed by a four-step method. The EM grids were sequentially transferred to 0.5, 0.25, 0.125, and 0 M sucrose with an interval of 2 min 30 s at 37°C. The oocytes were washed three times with fresh modified HTF (Millipore) medium and cultured in HTF medium until the start of the experiments (Cha et al., 2011).

### Preparation of *Kdm4a* mRNA

*In vitro* transcription was performed as described previously (Chung et al., 2015). In brief, full-length mouse *Kdm4a/Jhdm3a* cDNA was cloned into a pcDNA3.1 plasmid containing poly(A) 83 at the 3' end of the cloning site by using an In-Fusion Kit (Clontech #638909). Messenger RNA was synthesized from the linearized template plasmids by *in vitro* transcription using a mMESSAGE mMACHINE T7 Ultra Kit (Life Technologies #AM1345). The synthesized mRNA was dissolved in nuclease-free water. The concentration of mRNA was measured using a NanoDrop ND-1000 spectrophotometer (NanoDrop Technologies); aliquots of mRNA were stored at -80°C until use.

### SCNT and Embryonic Development

After incubation at 37°C, the cumulus of fresh or vitrified/warmed oocytes was denuded and fresh cumulus cells were also collected as

nuclear donors. The fresh and vitrified/warmed oocytes were enucleated in M2 medium containing 5 µg/mL cytochalasin B. For nuclear transfer, cumulus cells were injected into enucleated oocytes in M2 medium using a piezo-driven micromanipulator (Primetech, Tsuchiura-shi, Japan). After nuclear transfer, the reconstructed embryos were activated for 6 h by 10 mM SrCl<sub>2</sub>, 2 mM EGTA, and 5 µg/mL cytochalasin B in M16 (Millipore) medium and then cultured in KSOM in a humidified atmosphere of 5% CO<sub>2</sub> at 37°C. The group of cloned embryos from SCNT using fresh oocyte cytoplasm (FOC) was referred as SCNT-FOC, and the group using vitrified/warmed (cryopreserved/thawed) oocyte cytoplasm was referred to as SCNT-CROC. In the first-round experiment, cloned embryos of both groups were injected with ~10 pL of water (control) or 2 µg/µL *Kdm4a* mRNA using a piezo-driven micromanipulator. In the second-round experiment, cloned embryos from the SCNT-CROC group were first injected with *Kdm4a* (SCNT-CROC + K) and then cultured in KSOM medium with or without 10 µM melatonin (Sigma). The concentration of melatonin was chosen from our previous report (Kim et al., 2013) and comparison test (data not shown). The embryonic development of cloned embryos was assessed for 5 days (120 h) after activation.

### Immunofluorescence

Cloned embryos were washed in PBS containing 0.1% polyvinyl alcohol (PVA) and then fixed in 4% (w/v) paraformaldehyde at room temperature for 30 min. The oocytes were then washed in PBS/PVA and incubated overnight in PBS containing 1% BSA and 0.1% Triton X-100 at 4°C. Following this, the oocytes were washed three times in PBS-0.1% BSA and incubated with a 1:200 dilution of H3K9me3 antibody (07-442, Millipore) at the 1- and 2-cell stages and purified mouse anti-OCT-3/4 (611203, BD Bioscience) at the blastocyst stage for 2 h at room temperature. The cloned embryos were then washed three times in PBS-0.1% BSA and incubated with a 1:200 dilution of goat anti-mouse antibody (ab150113, Abcam) for 1 h at room temperature. Following this, they were washed in PBS-0.1% BSA three additional times. The DNA was visualized by staining the oocytes with 4',6-diamidino-2-phenylindole (DAPI; D5942, Sigma-Aldrich). The embryos were mounted on glass slides with a drop of fluorescent mounting medium and then observed using fluorescence confocal microscopy (Zeiss LSM880; Zeiss, Jena, Germany).

### Detection of DNA Fragmentation by TUNEL

DNA fragmentation was detected using TUNEL staining (*in situ* Cell Death Detection Kit, Roche, Indianapolis, IN). According to the instruction manual, SCNT-derived blastocysts were washed three times in 0.1% PVA in Dulbecco's PBS. The embryos were then incubated in TUNEL reaction medium at 37°C in the dark for 1 h. DNA staining with 1 µg/mL Hoechst 33342 (bis-benzimide, Sigma) was used for nuclear counterstaining. Signals in embryos were observed with a confocal microscope (Zeiss LSM880).

### Analysis of ROS Level

In the SCNT-CROC + K group, embryos at the morula or blastocyst stages were treated with or without melatonin and incubated in culture medium containing 5 µM CellROX Oxidative Stress Reagents (Molecular Probes, Eugene, OR) for 30 min, then washed

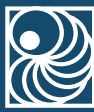

two times with 0.1% PVA-D-PBS. Embryos were examined under a fluorescence confocal microscope (Zeiss LSM880). The recorded fluorescence intensities were analyzed using ImageJ software. The fluorescence pixel value of the embryos was measured within a constant area from different embryos' cytoplasmic regions. Background fluorescent values were subtracted from the final values before analysis of statistically significant differences between the groups. The experiment was replicated three times with 5–10 embryos in each replicate.

### RNA-Seq Analysis of Cloned Embryos and Blastocysts

We performed two rounds of RNA-seq analysis. In the first round, gene expression was assessed in 2-cell embryos between SCNT-CROC + K and SCNT-CROC + K (100 embryos per sample, repeated three times). In the second round, gene expression was assessed in 2-cell embryos and blastocysts between SCNT-CROC + K and SCNT-CROC + K + M (50 2-cell embryos and 50 blastocysts per sample, repeated two times). Complementary DNAs (cDNAs) were amplified using a SMARTer Ultra Low Input RNA cDNA preparation kit (Takara, 634890) according to the manufacturer's instructions. The cDNAs were then fragmented into approximately 200-bp fragments using an M220 sonicator (Covaris). The fragmented cDNAs were end-repaired and adapter-ligated. The sequencing libraries were prepared using a ScriptSeq v2 kit (Illumina) according to the manufacturer's instructions. Single-end sequencing was performed on a HiSeq2500 (Illumina), and reads were mapped to the mm9 mouse genome using STAR (v2.5.2b, <https://github.com/alexdobin/STAR>). After mapping, FPKM was calculated by Cufflinks (v2.2.1) using a default option. Genes were considered differentially expressed at FC >2–5 and FPKM > 5. KEGG pathway analysis was visualized by ClueGO package. Gene set enrichment analysis was also used to identify biological function of the DEGs. An R (v3.3.2) package was used for statistical analyses and scatterplot generation.

### Embryo Transfer and Implantation Monitoring

Reconstructed embryos cultured to the blastocyst stage under melatonin treatment or non-treatment conditions (SCNT-CROC + K and SCNT-CROC + K + M groups) were transferred into the uteri of 2.5-day pseudopregnant female ICR mice that had been mated with vasectomized male ICR mice. Each group was transplanted into the left (SCNT-CROC + K) and right (SCNT-CROC + K + M) uterus in the same mouse. Females were subsequently checked for implantation rate at 7.5 days post coitus. For visualization of implantation, mice were euthanized, the intact uterus was excised into normal saline, adhering fat was dissected away, and the tissue was photographed.

### Derivation of Mouse Embryonic Stem Cells from SCNT Blastocysts

Hatched blastocysts obtained from both groups (SCNT-CROC + K and SCNT-CROC + K + M) were placed on mitotic inactivated mouse embryonic fibroblast (MEF) feeder cells in mESC culture medium to form outgrowths. We used DMEM/F12 containing 20% KSR, 0.1 mM  $\beta$ -mercaptoethanol, 1% non-essential amino acids, 100 units/mL penicillin, 100  $\mu$ g/mL streptomycin (all products from Gibco/Invitrogen, Grand Island, NY), and  $1.5 \times 10^3$  units/mL recombinant mouse leukemia inhibitory factor

(Chemicon, Temecula, CA) for mESC culture medium. Outgrowths were transferred onto new MEF feeder cells, mechanically at first, then passaged using trypsin-EDTA. All of the established mESC lines were monitored and then characterized by morphology and alkaline phosphatase staining. Alkaline phosphatase activity was assessed by histochemical staining. Colonies were fixed in 4% paraformaldehyde at room temperature for 1 min, washed twice with PBS, and stained with an alkaline phosphatase substrate solution (10 mL of FRV-alkaline solution, 10 mL of naphthol AS-BI alkaline solution; alkaline phosphatase kit, Sigma-Aldrich) for 30 min at room temperature. Alkaline phosphatase activity was detected colorimetrically by light microscopy.

### Statistical Analysis

All the experiments were repeated at least three times. The results are presented as mean or mean  $\pm$  SEM. Embryonic developments were analyzed by one-way ANOVA by Duncan's test using SAS software and implantation, and ESC-derivation rates were analyzed by the Chi-square test.  $p < 0.05$  was regarded as statically significant.

### ACCESSION NUMBERS

The GEO accession number for the RNA-seq data reported in this paper is GEO: GSE125389.

### SUPPLEMENTAL INFORMATION

Supplemental Information includes two figures and two tables and can be found with this article online at <https://doi.org/10.1016/j.stemcr.2019.01.019>.

### AUTHOR CONTRIBUTIONS

A.R.L. and K.H. designed and performed the experiments, analyzed data, and wrote the manuscript. S.H.C., C.P., J.K.P., J.I.L., J.I.B., D.-W.S., and J.E.L. performed the experiments and analyzed data. D.R.L. designed and directed the experiments, analyzed and assembled data, and wrote the manuscript. All authors read and approved the final manuscript.

### ACKNOWLEDGMENTS

This research was supported partly by the Bio & Medical Technology Development Program of the National Research Foundation and funded by the Korean government MSIT (2015M3A9C6028961, 2017M3A9C6061284, and 2017M3A9C8029318). All authors state that they have no conflicts of interest to disclose.

Received: September 10, 2018

Revised: January 22, 2019

Accepted: January 23, 2019

Published: February 21, 2019

### REFERENCES

Abecia, J.A., Forcada, F., and Zuniga, O. (2002). The effect of melatonin on the secretion of progesterone in sheep and on the development of ovine embryos in vitro. *Vet. Res. Commun.* 26, 151–158.



- Arjmand, F., Khanmohammadi, M., Arasteh, S., Mohammadzadeh, A., Kazemnejad, S., and Akhondi, M.M. (2016). Extended culture of encapsulated human blastocysts in alginate hydrogel containing decidualized endometrial stromal cells in the presence of melatonin. *Mol. Biotechnol.* *58*, 684–694.
- Baek, J.I., Seol, D.W., Lee, A.R., Lee, W.S., Yoon, S.Y., and Lee, D.R. (2017). Maintained MPF level after oocyte vitrification improves embryonic development after IVF, but not after somatic cell nuclear transfer. *Mol. Cells* *40*, 871–879.
- Calvo, J.R., Gonzalez-Yanes, C., and Maldonado, M.D. (2013). The role of melatonin in the cells of the innate immunity: a review. *J. Pineal Res.* *55*, 103–120.
- Cha, S.K., Kim, B.Y., Kim, M.K., Kim, Y.S., Lee, W.S., Yoon, T.K., and Lee, D.R. (2011). Effects of various combinations of cryoprotectants and cooling speed on the survival and further development of mouse oocytes after vitrification. *Clin. Exp. Reprod. Med.* *38*, 24–30.
- Chen, S.U., Lien, Y.R., Chen, H.F., Chao, K.H., Ho, H.N., and Yang, Y.S. (2000). Open pulled straws for vitrification of mature mouse oocytes preserve patterns of meiotic spindles and chromosomes better than conventional straws. *Hum. Reprod.* *15*, 2598–2603.
- Choi, J., Park, S.M., Lee, E., Kim, J.H., Jeong, Y.I., Lee, J.Y., Park, S.W., Kim, H.S., Hossein, M.S., Jeong, Y.W., et al. (2008). Anti-apoptotic effect of melatonin on preimplantation development of porcine parthenogenetic embryos. *Mol. Reprod. Dev.* *75*, 1127–1135.
- Chung, Y.G., Eum, J.H., Lee, J.E., Shim, S.H., Sepilian, V., Hong, S.W., Lee, Y., Treff, N.R., Choi, Y.H., Kimbrel, E.A., et al. (2014). Human somatic cell nuclear transfer using adult cells. *Cell Stem Cell* *14*, 777–780.
- Chung, Y.G., Matoba, S., Liu, Y., Eum, J.H., Lu, F., Jiang, W., Lee, J.E., Sepilian, V., Cha, K.Y., Lee, D.R., et al. (2015). Histone demethylase expression enhances human somatic cell nuclear transfer efficiency and promotes derivation of pluripotent stem cells. *Cell Stem Cell* *17*, 758–766.
- Falcone, T., Attaran, M., Bedaiwy, M.A., and Goldberg, J.M. (2004). Ovarian function preservation in the cancer patient. *Fertil. Steril.* *81*, 243–257.
- Gao, C., Han, H.B., Tian, X.Z., Tan, D.X., Wang, L., Zhou, G.B., Zhu, S.E., and Liu, G.S. (2012). Melatonin promotes embryonic development and reduces reactive oxygen species in vitrified mouse 2-cell embryos. *J. Pineal Res.* *52*, 305–311.
- Gook, D.A., Osborn, S.M., and Johnston, W.I. (1993). Cryopreservation of mouse and human oocytes using 1,2-propanediol and the configuration of the meiotic spindle. *Hum. Reprod.* *8*, 1101–1109.
- Hirata, S., Fukasawa, H., Wakayama, S., Wakayama, T., and Hoshi, K. (2011). Generation of healthy cloned mice using enucleated cryopreserved oocytes. *Cell Reprogram.* *13*, 7–11.
- Hotamisligil, S., Toner, M., and Powers, R.D. (1996). Changes in membrane integrity, cytoskeletal structure, and developmental potential of murine oocytes after vitrification in ethylene glycol. *Biol. Reprod.* *55*, 161–168.
- Ishizuka, B., Kuribayashi, Y., Murai, K., Amemiya, A., and Itoh, M.T. (2000). The effect of melatonin on in vitro fertilization and embryo development in mice. *J. Pineal Res.* *28*, 48–51.
- Joly, C., Bchini, O., Boulekbache, H., Testart, J., and Maro, B. (1992). Effects of 1,2-propanediol on the cytoskeletal organization of the mouse oocyte. *Hum. Reprod.* *7*, 374–378.
- Kanatsu-Shinohara, M., Inoue, K., Lee, J., Yoshimoto, M., Ogonuki, N., Miki, H., Baba, S., Kato, T., Kazuki, Y., Toyokuni, S., et al. (2004). Generation of pluripotent stem cells from neonatal mouse testis. *Cell* *119*, 1001–1012.
- Kang, E., Wang, X., Tippner-Hedges, R., Ma, H., Folmes, C.D., Gutierrez, N.M., Lee, Y., Van Dyken, C., Ahmed, R., Li, Y., et al. (2016). Age-related accumulation of somatic mitochondrial DNA mutations in adult-derived human iPSCs. *Cell Stem Cell* *18*, 625–636.
- Kazem, R., Thompson, L.A., Srikantharajah, A., Laing, M.A., Hamilton, M.P., and Templeton, A. (1995). Cryopreservation of human oocytes and fertilization by two techniques: in-vitro fertilization and intracytoplasmic sperm injection. *Hum. Reprod.* *10*, 2650–2654.
- Kim, M.K., Park, E.A., Kim, H.J., Choi, W.Y., Cho, J.H., Lee, W.S., Cha, K.Y., Kim, Y.S., Lee, D.R., and Yoon, T.K. (2013). Does supplementation of in-vitro culture medium with melatonin improve IVF outcome in PCOS? *Reprod. Biomed. Online* *26*, 22–29.
- Kishigami, S., Mizutani, E., Ohta, H., Hikichi, T., Thuan, N.V., Wakayama, S., Bui, H.T., and Wakayama, T. (2006). Significant improvement of mouse cloning technique by treatment with trichostatin A after somatic nuclear transfer. *Biochem. Biophys. Res. Commun.* *340*, 183–189.
- Lanza, R.P., Cibelli, J.B., and West, M.D. (1999). Prospects for the use of nuclear transfer in human transplantation. *Nat. Biotechnol.* *17*, 1171–1174.
- Lee, J.E., Chung, Y.G., Eum, J.H., Lee, Y., and Lee, D.R. (2016). An efficient SCNT technology for the establishment of personalized and public human pluripotent stem cell banks. *BMB Rep.* *49*, 197–198.
- Liang, S., Jin, Y.X., Yuan, B., Zhang, J.B., and Kim, N.H. (2017). Melatonin enhances the developmental competence of porcine somatic cell nuclear transfer embryos by preventing DNA damage induced by oxidative stress. *Sci. Rep.* *7*, 11114.
- Luberda, Z. (2005). The role of glutathione in mammalian gametes. *Reprod. Biol.* *5*, 5–17.
- Ma, H., Morey, R., O’Neil, R.C., He, Y., Daughtry, B., Schultz, M.D., Hariharan, M., Nery, J.R., Castanon, R., Sabatini, K., et al. (2014). Abnormalities in human pluripotent cells due to reprogramming mechanisms. *Nature* *511*, 177–183.
- Manchester, L.C., Coto-Montes, A., Boga, J.A., Andersen, L.P., Zhou, Z., Galano, A., Vriend, J., Tan, D.X., and Reiter, R.J. (2015). Melatonin: an ancient molecule that makes oxygen metabolically tolerable. *J. Pineal Res.* *59*, 403–419.
- Matoba, S., Liu, Y., Lu, F., Iwabuchi, K.A., Shen, L., Inoue, A., and Zhang, Y. (2014). Embryonic development following somatic cell nuclear transfer impeded by persisting histone methylation. *Cell* *159*, 884–895.
- Matoba, S., and Zhang, Y. (2018). Somatic cell nuclear transfer reprogramming: mechanisms and applications. *Cell Stem Cell* *23*, 471–485.
- Nakagata, N., Takeo, T., Fukumoto, K., Kondo, T., Haruguchi, Y., Takeshita, Y., Nakamuta, Y., Matsunaga, H., Tsuchiyama, S.,



- Ishizuka, Y., et al. (2013). Applications of cryopreserved unfertilized mouse oocytes for in vitro fertilization. *Cryobiology* 67, 188–192.
- Nakamura, B.N., Fielder, T.J., Hoang, Y.D., Lim, J., McConnachie, L.A., Kavanagh, T.J., and Luderer, U. (2011). Lack of maternal glutamate cysteine ligase modifier subunit (Gclm) decreases oocyte glutathione concentrations and disrupts preimplantation development in mice. *Endocrinology* 152, 2806–2815.
- Nakano, M., Kato, Y., and Tsunoda, Y. (2012). Effect of melatonin treatment on the developmental potential of parthenogenetic and somatic cell nuclear-transferred porcine oocytes in vitro. *Zygote* 20, 199–207.
- Nichols, J., Zevnik, B., Anastassiadis, K., Niwa, H., Klewe-Nebenius, D., Chambers, I., Scholer, H., and Smith, A. (1998). Formation of pluripotent stem cells in the mammalian embryo depends on the POU transcription factor Oct4. *Cell* 95, 379–391.
- Pang, Y.W., An, L., Wang, P., Yu, Y., Yin, Q.D., Wang, X.H., Xin, Z., Qian, Z., Yang, M.L., Min, G., et al. (2013). Treatment of porcine donor cells and reconstructed embryos with the antioxidant melatonin enhances cloning efficiency. *J. Pineal Res.* 54, 389–397.
- Papis, K., Poleszczuk, O., Wenta-Muchalska, E., and Modlinski, J.A. (2007). Melatonin effect on bovine embryo development in vitro in relation to oxygen concentration. *J. Pineal Res.* 43, 321–326.
- Practice Committees of American Society for Reproductive Medicine; Society for Assisted Reproductive Technology (2013). Mature oocyte cryopreservation: a guideline. *Fertil. Steril.* 99, 37–43.
- Reiter, R.J., Mayo, J.C., Tan, D.X., Sainz, R.M., Alatorre-Jimenez, M., and Qin, L. (2016). Melatonin as an antioxidant: under promises but over delivers. *J. Pineal Res.* 61, 253–278.
- Reiter, R.J., Tan, D.X., Mayo, J.C., Sainz, R.M., Leon, J., and Czarnecki, Z. (2003). Melatonin as an antioxidant: biochemical mechanisms and pathophysiological implications in humans. *Acta Biochim. Pol.* 50, 1129–1146.
- Salehi, M., Kato, Y., and Tsunoda, Y. (2014). Effect of melatonin treatment on developmental potential of somatic cell nuclear-transferred mouse oocytes in vitro. *Zygote* 22, 213–217.
- Shi, J.M., Tian, X.Z., Zhou, G.B., Wang, L., Gao, C., Zhu, S.E., Zeng, S.M., Tian, J.H., and Liu, G.S. (2009). Melatonin exists in porcine follicular fluid and improves in vitro maturation and parthenogenetic development of porcine oocytes. *J. Pineal Res.* 47, 318–323.
- Song, C., Peng, W., Yin, S., Zhao, J., Fu, B., Zhang, J., Mao, T., Wu, H., and Zhang, Y. (2016). Melatonin improves age-induced fertility decline and attenuates ovarian mitochondrial oxidative stress in mice. *Sci. Rep.* 6, 35165.
- Strumpf, D., Mao, C.A., Yamanaka, Y., Ralston, A., Chawengsakso-phak, K., Beck, F., and Rossant, J. (2005). Cdx2 is required for correct cell fate specification and differentiation of trophectoderm in the mouse blastocyst. *Development* 132, 2093–2102.
- Su, J., Wang, Y., Xing, X., Zhang, L., Sun, H., and Zhang, Y. (2015). Melatonin significantly improves the developmental competence of bovine somatic cell nuclear transfer embryos. *J. Pineal Res.* 59, 455–468.
- Tachibana, M., Amato, P., Sparman, M., Gutierrez, N.M., Tippner-Hedger, R., Ma, H., Kang, E., Fulati, A., Lee, H.S., Sritanaudomchai, H., et al. (2013). Human embryonic stem cells derived by somatic cell nuclear transfer. *Cell* 153, 1228–1238.
- Takahashi, K., Tanabe, K., Ohnuki, M., Narita, M., Ichisaka, T., Tomoda, K., and Yamanaka, S. (2007). Induction of pluripotent stem cells from adult human fibroblasts by defined factors. *Cell* 131, 861–872.
- Tamura, H., Kawamoto, M., Sato, S., Tamura, I., Maekawa, R., Take-tani, T., Aasada, H., Takaki, E., Nakai, A., Reiter, R.J., et al. (2017). Long-term melatonin treatment delays ovarian aging. *J. Pineal Res.* 62. <https://doi.org/10.1111/jpi.12381>.
- Taylor, C.J., Peacock, S., Chaudhry, A.N., Bradley, J.A., and Bolton, E.M. (2012). Generating an iPSC bank for HLA-matched tissue transplantation based on known donor and recipient HLA types. *Cell Stem Cell* 11, 147–152.
- Tian, X., Wang, F., He, C., Zhang, L., Tan, D., Reiter, R.J., Xu, J., Ji, P., and Liu, G. (2014). Beneficial effects of melatonin on bovine oocytes maturation: a mechanistic approach. *J. Pineal Res.* 57, 239–247.
- Van Blerkom, J., and Davis, P.W. (1994). Cytogenetic, cellular, and developmental consequences of cryopreservation of immature and mature mouse and human oocytes. *Microsc. Res. Tech.* 27, 165–193.
- Van der Elst, J., Van den Abbeel, E., Nerinckx, S., and Van Steirteghem, A. (1992). Parthenogenetic activation pattern and microtubular organization of the mouse oocyte after exposure to 1,2-propanediol. *Cryobiology* 29, 549–562.
- Wei, J.Y., Li, W.M., Zhou, L.L., Lu, Q.N., and He, W. (2015). Melatonin induces apoptosis of colorectal cancer cells through HDAC4 nuclear import mediated by CaMKII inactivation. *J. Pineal Res.* 58, 429–438.
- Yamada, M., Johannesson, B., Sagi, I., Burnett, L.C., Kort, D.H., Prosser, R.W., Paull, D., Nestor, M.W., Freeby, M., Greenberg, E., et al. (2014). Human oocytes reprogram adult somatic nuclei of a type 1 diabetic to diploid pluripotent stem cells. *Nature* 510, 533–536.
- Yang, N.J., Seol, D.W., Jo, J., Jang, H.M., Yoon, S.Y., Lee, W.S., and Lee, D.R. (2016). Supplementation with cell-penetrating peptide-conjugated estrogen-related receptor beta improves the formation of the inner cell mass and the development of vitrified/warmed mouse embryos. *Reprod. Sci.* 23, 1509–1517.
- Yang, X., Smith, S.L., Tian, X.C., Lewin, H.A., Renard, J.P., and Wakayama, T. (2007). Nuclear reprogramming of cloned embryos and its implications for therapeutic cloning. *Nat. Genet.* 39, 295–302.
- Zhang, H.M., and Zhang, Y. (2014). Melatonin: a well-documented antioxidant with conditional pro-oxidant actions. *J. Pineal Res.* 57, 131–146.
- Zhang, L., Xue, X., Yan, J., Yan, L.Y., Jin, X.H., Zhu, X.H., He, Z.Z., Liu, J., Li, R., and Qiao, J. (2016). L-proline: a highly effective cryoprotectant for mouse oocyte vitrification. *Sci. Rep.* 6, 26326.
- Zhao, X.M., Hao, H.S., Du, W.H., Zhao, S.J., Wang, H.Y., Wang, N., Wang, D., Liu, Y., Qin, T., and Zhu, H.B. (2016). Melatonin inhibits apoptosis and improves the developmental potential of vitrified bovine oocytes. *J. Pineal Res.* 60, 132–141.



**Stem Cell Reports, Volume 12**

**Supplemental Information**

**Anti-apoptotic Regulation Contributes to the Successful Nuclear Re-programming Using Cryopreserved Oocytes**

**Ah Reum Lee, Kwonho Hong, Seo Hye Choi, Chanhyeok Park, Jae Kyun Park, Jin Il Lee, Jae Il Bang, Dong-Won Seol, Jeoung Eun Lee, and Dong Ryul Lee**

**Title: Anti-apoptotic regulation contributes successful nuclear reprogramming using cryopreserved oocytes**

**Authors:**

**Ah Reum Lee<sup>1,5</sup>, Kwon Ho Hong<sup>2,5</sup>, Seo Hye Choi<sup>1</sup>, Chan Hyeok Park<sup>2</sup>, Jae Kyun Park<sup>3</sup>, Jin Il Lee<sup>3</sup>, Jae Il Bang<sup>1</sup>, Dong-Wong Seol<sup>1</sup>, Jeoung Eun Lee, Dong Ryul Lee<sup>1,4,\*</sup>**

<sup>1</sup>Department of Biomedical Science, College of Life Science, CHA University, Seoul, Korea.

<sup>2</sup>Department of Stem Cell and Regenerative Biotechnology, Konkuk University, Seoul, Korea.

<sup>3</sup>Fertility Center of CHA Gangnam Medical Center, College of Medicine, CHA University, Seoul, Korea.

<sup>4</sup>CHA Stem Cell Institute, CHA University, Seoul, Korea.

<sup>5</sup> These authors contributed equally to this study.

**\* To whom correspondence may be addressed: Dong Ryul Lee, Ph.D.**, Department of Biomedical Science, College of Life Science, CHA University, 335 Pankyo-ro, Seongnam-si, Gyeonggi-do 13488, Korea. Tel: +82-31-881-7136, Fax: +82-31-881-7100, E-mail: drleedr@cha.ac.kr

**Running Head:** *Somatic cell nuclear transfer using cryopreserved oocytes*

**Acknowledgement:** This research was supported partly by the Bio & Medical Technology Development Program of the National Research Foundation (NRF) and funded by the Korean government MSIT (2015M3A9C6028961, 2017M3A9C6061284 and 2017M3A9C8029318). All authors state that they have no conflicts of interest to disclose.

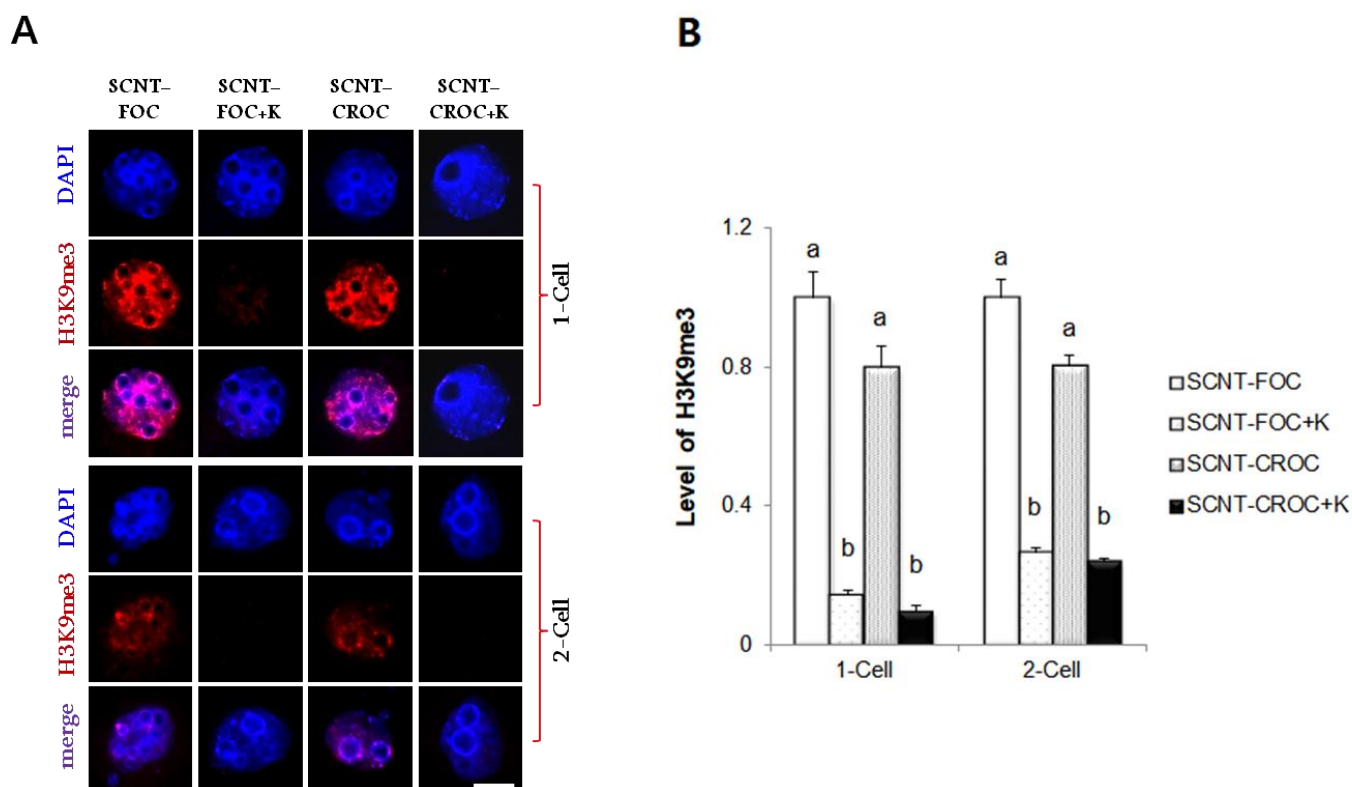

**FIGURE S1. Injection of *Kdm4a* mRNA removes H3K9me3 of SCNT embryos using fresh oocyte cytoplasm (SCNT-FOC) and cryopreserved oocyte cytoplasm (SCNT-CROC) at the 1-cell and 2-cell stage (related to Table 1). A) Representative nuclear images of 1-cell and 2-cell stage SCNT embryos stained with anti-H3K9me3 and DAPI. Shown in each panel is a nucleus of a single blastomere. Scale bar, 10  $\mu$ m. B) Bar graph showing reduced expression intensity of H3K9me3 between cloned embryos from SCNT-FOC and SCNT-CROC groups at the 1-cell and 2-cell stage.**

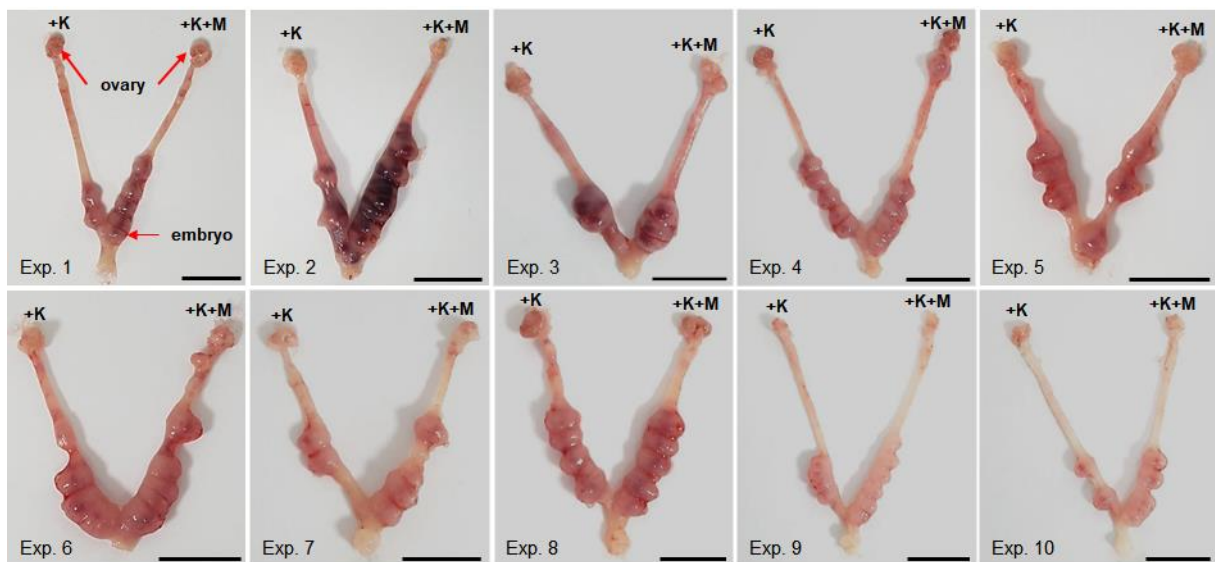

**FIGURE S2. Photographs of uteri with implantation sites at day 7 (related to Fig.4).** Allows indicate ovary and implantation site, respectively. In 9 out of 11 experiments, the number of implantation sites was increased in the SCNT-CROC+M+K group compared to those in the SCNT-CROC+K group.



## Reference of Table S1 and S2

1. GU B, ZHANG J, CHEN Q et al. Aire regulates the expression of differentiation-associated genes and self-renewal of embryonic stem cells. *Biochemical and biophysical research communications* 2010; **394**:418-23.
2. SHEN Y, MCMACKIN MZ, SHAN Y et al. Frataxin Deficiency Promotes Excess Microglial DNA Damage and Inflammation that Is Rescued by PJ34. *PloS one* 2016; **11**:e0151026.
3. CARLETTI B, PIERMARINI E, TOZZI G et al. Frataxin silencing inactivates mitochondrial Complex I in NSC34 motoneuronal cells and alters glutathione homeostasis. *International journal of molecular sciences* 2014; **15**:5789-806.
4. CALMELS N, SCHMUCKER S, WATTENHOFER-DONZE M et al. The first cellular models based on frataxin missense mutations that reproduce spontaneously the defects associated with Friedreich ataxia. *PloS one* 2009; **4**:e6379.
5. PFISTER AS, KEIL M, KUHL M. The Wnt Target Protein Peter Pan Defines a Novel p53-independent Nucleolar Stress-Response Pathway. *The Journal of biological chemistry* 2015; **290**:10905-18.
6. VILLALBA-BENITO L, TORROGLOSA A, FERNANDEZ RM et al. Overexpression of DNMT3b target genes during Enteric Nervous System development contribute to the onset of Hirschsprung disease. *Scientific reports* 2017; **7**:6221.
7. LEE HJ, PAZIN DE, KAHLON RS et al. Novel markers of early ovarian pre-granulosa cells are expressed in an Sry-like pattern. *Developmental dynamics : an official publication of the American Association of Anatomists* 2009; **238**:812-25.
8. HOPKINS J, HWANG G, JACOB J et al. Meiosis-specific cohesin component, Stag3 is essential for maintaining centromere chromatid cohesion, and required for DNA repair and synapsis between homologous chromosomes. *PLoS genetics* 2014; **10**:e1004413.
9. LLANO E, GOMEZ HL, GARCIA-TUNON I et al. STAG3 is a strong candidate gene for male infertility. *Human molecular genetics* 2014; **23**:3421-31.
10. FUKUDA T, FUKUDA N, AGOSTINHO A et al. STAG3-mediated stabilization of REC8 cohesin complexes promotes chromosome synapsis during meiosis. *The EMBO journal* 2014; **33**:1243-55.
11. BREUSS MW, SULTAN T, JAMES KN et al. Autosomal-Recessive Mutations in the tRNA Splicing Endonuclease Subunit TSEN15 Cause Pontocerebellar Hypoplasia and Progressive Microcephaly. *American journal of human genetics* 2016; **99**:228-35.
12. ZHAO XS, FU WY, HUNG KW et al. NRC-interacting factor directs neurite outgrowth in an activity-dependent manner. *Neuroscience* 2015; **289**:207-13.
13. YANG YJ, BALTUS AE, MATHEW RS et al. Microcephaly gene links trithorax and REST/NRSF to control neural stem cell proliferation and differentiation. *Cell* 2012; **151**:1097-112.
14. HAYASHI M, TOJO A, SHIMOSAWA T et al. The role of adrenomedullin in the renal NADPH oxidase and (pro)renin in diabetic mice. *Journal of diabetes research* 2013; **2013**:134395.
15. VERGANO-VERA E, FERNANDEZ AP, HURTADO-CHONG A et al. Lack of adrenomedullin affects growth and differentiation of adult neural stem/progenitor cells. *Cell and tissue research* 2010; **340**:1-11.
16. ALBERTSEN M, TEPERER M, ELHOLM G et al. Localization and differential expression of the Kruppel-associated box zinc finger proteins 1 and 54 in early mouse development. *DNA and cell biology* 2010; **29**:589-601.

17. JIANG J, LV W, YE X et al. Zscan4 promotes genomic stability during reprogramming and dramatically improves the quality of iPS cells as demonstrated by tetraploid complementation. *Cell research* 2013; **23**:92-106.
18. RAUNER M, FOGER-SAMWALD U, KURZ MF et al. Cathepsin S controls adipocytic and osteoblastic differentiation, bone turnover, and bone microarchitecture. *Bone* 2014; **64**:281-7.
19. WANG B, SUN J, KITAMOTO S et al. Cathepsin S controls angiogenesis and tumor growth via matrix-derived angiogenic factors. *The Journal of biological chemistry* 2006; **281**:6020-9.
20. ZHENG T, KANG MJ, CROTHERS K et al. Role of cathepsin S-dependent epithelial cell apoptosis in IFN-gamma-induced alveolar remodeling and pulmonary emphysema. *Journal of immunology* 2005; **174**:8106-15.
21. BOULARES AH, ZOLTOSKI AJ, SHERIF ZA et al. Roles of DNA fragmentation factor and poly(ADP-ribose) polymerase-1 in sensitization of fibroblasts to tumor necrosis factor-induced apoptosis. *Biochemical and biophysical research communications* 2002; **290**:796-801.
22. YAN B, WANG H, PENG Y et al. A unique role of the DNA fragmentation factor in maintaining genomic stability. *Proceedings of the National Academy of Sciences of the United States of America* 2006; **103**:1504-9.
23. LEE JY, KIM HJ, RHO SB et al. eIF3f reduces tumor growth by directly interrupting clusterin with anti-apoptotic property in cancer cells. *Oncotarget* 2016; **7**:18541-57.
24. SHI J, HERSHEY JW , NELSON MA Phosphorylation of the eukaryotic initiation factor 3f by cyclin-dependent kinase 11 during apoptosis. *FEBS letters* 2009; **583**:971-7.
25. FRACCASCIA P, CASTEELS M, DE SCHRYVER E et al. Role of thiamine pyrophosphate in oligomerisation, functioning and import of peroxisomal 2-hydroxyacyl-CoA lyase. *Biochimica et biophysica acta* 2011; **1814**:1226-33.
26. ROGON C, ULBRICHT A, HESSE M et al. HSP70-binding protein HSPBP1 regulates chaperone expression at a posttranslational level and is essential for spermatogenesis. *Molecular biology of the cell* 2014; **25**:2260-71.
27. LENG JJ, TAN HM, CHEN K et al. Growth-inhibitory effects of MOB2 on human hepatic carcinoma cell line SMMC-7721. *World journal of gastroenterology* 2012; **18**:7285-9.
28. GOMEZ V, GUNDOGDU R, GOMEZ M et al. Regulation of DNA damage responses and cell cycle progression by hMOB2. *Cellular signalling* 2015; **27**:326-39.
29. SUN XX, DAI MS , LU H 5-fluorouracil activation of p53 involves an MDM2-ribosomal protein interaction. *The Journal of biological chemistry* 2007; **282**:8052-9.
30. LIU L, LUO C, LUO Y et al. MRPL33 and its splicing regulator hnRNPk are required for mitochondria function and implicated in tumor progression. *Oncogene* 2018; **37**:86-94.
31. WANG J, LIU Y, LIU F et al. Loss-of-function Mutation in PMVK Causes Autosomal Dominant Disseminated Superficial Porokeratosis. *Scientific reports* 2016; **6**:24226.
32. ROY S, PRANEETHA DC , VENDRA VP Mutations in the Corneal Endothelial Dystrophy-Associated Gene SLC4A11 Render the Cells More Vulnerable to Oxidative Insults. *Cornea* 2015; **34**:668-74.
33. LIU J, SEET LF, KOH LW et al. Depletion of SLC4A11 causes cell death by apoptosis in an immortalized human corneal endothelial cell line. *Investigative ophthalmology & visual science* 2012; **53**:3270-9.
34. JANGANI M, POOLMAN TM, MATTHEWS L et al. The methyltransferase WBSR22/Merm1 enhances glucocorticoid receptor function and is regulated in lung inflammation and cancer. *The Journal of*

- biological chemistry 2014; **289**:8931-46.
35. YAN D, TU L, YUAN H et al. WBSCR22 confers oxaliplatin resistance in human colorectal cancer. *Scientific reports* 2017; **7**:15443.
  36. OUNAP K, KASPER L, KURG A et al. The human WBSCR22 protein is involved in the biogenesis of the 40S ribosomal subunits in mammalian cells. *PloS one* 2013; **8**:e75686.
  37. OKADA R, WU Z, ZHU A et al. Cathepsin D deficiency induces oxidative damage in brain pericytes and impairs the blood-brain barrier. *Molecular and cellular neurosciences* 2015; **64**:51-60.
  38. YANG D, MENG X, XUE B et al. MiR-942 mediates hepatitis C virus-induced apoptosis via regulation of ISG12a. *PloS one* 2014; **9**:e94501.
  39. CHEN Y, JIAO B, YAO M et al. ISG12a inhibits HCV replication and potentiates the anti-HCV activity of IFN- $\alpha$  through activation of the Jak/STAT signaling pathway independent of autophagy and apoptosis. *Virus research* 2017; **227**:231-239.
  40. MCEVOY K, OSBORNE LM, NANAVATI J et al. Reproductive Affective Disorders: a Review of the Genetic Evidence for Premenstrual Dysphoric Disorder and Postpartum Depression. *Current psychiatry reports* 2017; **19**:94.
  41. ZHANG Z, ZHANG G, KONG C et al. METTL13 is downregulated in bladder carcinoma and suppresses cell proliferation, migration and invasion. *Scientific reports* 2016; **6**:19261.
  42. BLADT F, AIPPERSBACH E, GELKOP S et al. The murine Nck SH2/SH3 adaptors are important for the development of mesoderm-derived embryonic structures and for regulating the cellular actin network. *Molecular and cellular biology* 2003; **23**:4586-97.
  43. XIAHOU Z, WANG X, SHEN J et al. NMI and IFP35 serve as proinflammatory DAMPs during cellular infection and injury. *Nature communications* 2017; **8**:950.
  44. WANG J, ZOU K, FENG X et al. Downregulation of NMI promotes tumor growth and predicts poor prognosis in human lung adenocarcinomas. *Molecular cancer* 2017; **16**:158.
  45. MATSUDA S, OKADA N, KODAMA T et al. A cytotoxic type III secretion effector of *Vibrio parahaemolyticus* targets vacuolar H<sup>+</sup>-ATPase subunit c and ruptures host cell lysosomes. *PLoS pathogens* 2012; **8**:e1002803.
  46. FAN SH, WANG YY, WU ZY et al. AGPAT9 suppresses cell growth, invasion and metastasis by counteracting acidic tumor microenvironment through KLF4/LASS2/V-ATPase signaling pathway in breast cancer. *Oncotarget* 2015; **6**:18406-17.
  47. WANG H, DONG J, SHI P et al. Anti-mouse CD52 monoclonal antibody ameliorates intestinal epithelial barrier function in interleukin-10 knockout mice with spontaneous chronic colitis. *Immunology* 2015; **144**:254-62.
  48. ISSHIKI K, MATSUDA S, TSUJI A et al. cGMP-dependent protein kinase I promotes cell apoptosis through hyperactivation of death-associated protein kinase 2. *Biochemical and biophysical research communications* 2012; **422**:280-4.
  49. YUASA K, OTA R, MATSUDA S et al. Suppression of death-associated protein kinase 2 by interaction with 14-3-3 proteins. *Biochemical and biophysical research communications* 2015; **464**:70-5.
  50. MORQUETTE B, MORQUETTE P, AGOSTINONE J et al. REDD2-mediated inhibition of mTOR promotes dendrite retraction induced by axonal injury. *Cell death and differentiation* 2015; **22**:612-25.
  51. LUTHER J, GALA M, PATEL SJ et al. Loss of Response to Anti-Tumor Necrosis Factor Alpha Therapy in Crohn's Disease Is Not Associated with Emergence of Novel Inflammatory Pathways. *Digestive diseases and sciences* 2018; **63**:738-745.

52. MACFIE TS, POULSOM R, PARKER A et al. DUOX2 and DUOXA2 form the predominant enzyme system capable of producing the reactive oxygen species H<sub>2</sub>O<sub>2</sub> in active ulcerative colitis and are modulated by 5-aminosalicylic acid. *Inflammatory bowel diseases* 2014; **20**:514-24.
53. CHANG NS The non-ankyrin C terminus of Ikappa Balpha physically interacts with p53 in vivo and dissociates in response to apoptotic stress, hypoxia, DNA damage, and transforming growth factor-beta 1-mediated growth suppression. *The Journal of biological chemistry* 2002; **277**:10323-31.
54. BROUARD S, BERBERAT PO, TOBIASCH E et al. Heme oxygenase-1-derived carbon monoxide requires the activation of transcription factor NF-kappa B to protect endothelial cells from tumor necrosis factor-alpha-mediated apoptosis. *The Journal of biological chemistry* 2002; **277**:17950-61.
55. OMORI K, MORIKAWA T, KUNITA A et al. Lipocalin-type prostaglandin D synthase-derived PGD<sub>2</sub> attenuates malignant properties of tumor endothelial cells. *The Journal of pathology* 2018; **244**:84-96.
56. ZHANG B, BIE Q, WU P et al. PGD<sub>2</sub>/PTGDR2 Signaling Restricts the Self-Renewal and Tumorigenesis of Gastric Cancer. *Stem cells* 2018.
57. MARCHETTE LD, THOMPSON DA, KRAVTSOVA M et al. Retinol dehydrogenase 12 detoxifies 4-hydroxynonenal in photoreceptor cells. *Free radical biology & medicine* 2010; **48**:16-25.
58. HERNANDEZ-SANCHEZ M, POCH E, GUASCH RM et al. RhoE is required for contact inhibition and negatively regulates tumor initiation and progression. *Oncotarget* 2015; **6**:17479-90.
59. XUAN DY, LI X, DENG ZH et al. Identification and characterization of a novel gene, Mcpr1, and its possible function in the proliferation of embryonic palatal mesenchymal cells. *The Journal of biological chemistry* 2006; **281**:33997-4008.
60. SHI R, ZHANG C, WU Y et al. CDCA2 promotes lung adenocarcinoma cell proliferation and predicts poor survival in lung adenocarcinoma patients. *Oncotarget* 2017; **8**:19768-19779.
61. UCHIDA F, UZAWA K, KASAMATSU A et al. Overexpression of CDCA2 in human squamous cell carcinoma: correlation with prevention of G1 phase arrest and apoptosis. *PloS one* 2013; **8**:e56381.
62. VAGNARELLI P, RIBEIRO S, SENNELS L et al. Repo-Man coordinates chromosomal reorganization with nuclear envelope reassembly during mitotic exit. *Developmental cell* 2011; **21**:328-42.
63. PENG A, LEWELLYN AL, SCHIEMANN WP et al. Repo-man controls a protein phosphatase 1-dependent threshold for DNA damage checkpoint activation. *Current biology : CB* 2010; **20**:387-96.
64. AMIABLE C, POCHET S, PADILLA A et al. N (6)-substituted AMPs inhibit mammalian deoxynucleotide N-hydrolase DNP1. *PloS one* 2013; **8**:e80755.
65. FAN Y , GUO Y Knockdown of eIF3D inhibits breast cancer cell proliferation and invasion through suppressing the Wnt/beta-catenin signaling pathway. *International journal of clinical and experimental pathology* 2015; **8**:10420-7.
66. REN M, ZHOU C, LIANG H et al. RNAi-Mediated Silencing of EIF3D Alleviates Proliferation and Migration of Glioma U251 and U87MG Cells. *Chemical biology & drug design* 2015; **86**:715-22.
67. MACK DL, BOULANGER CA, CALLAHAN R et al. Expression of truncated Int6/eIF3e in mammary alveolar epithelium leads to persistent hyperplasia and tumorigenesis. *Breast cancer research : BCR* 2007; **9**:R42.
68. SHAH M, SU D, SCHELIGA JS et al. A Transcript-Specific eIF3 Complex Mediates Global Translational Control of Energy Metabolism. *Cell reports* 2016; **16**:1891-902.
69. YI P, GAO S, GU Z et al. P44/WDR77 restricts the sensitivity of proliferating cells to TGFbeta signaling. *Biochemical and biophysical research communications* 2014; **450**:409-15.
70. CHAO YX, HE BP, CAO Q et al. Protein aggregate-containing neuron-like cells are differentiated from bone



- marrow mesenchymal stem cells from mice with neurofilament light subunit gene deficiency. *Neuroscience letters* 2007; **417**:240-5.
71. CAPASSO M, DISKIN S, CIMMINO F et al. Common genetic variants in NEFL influence gene expression and neuroblastoma risk. *Cancer research* 2014; **74**:6913-24.
  72. TAO J, TAO S, HAN J et al. RECQL1 plays an important role in the development of tongue squamous cell carcinoma. *Cellular physiology and biochemistry : international journal of experimental cellular physiology, biochemistry, and pharmacology* 2014; **33**:1579-90.
  73. REN J, YANG Y, XUE J et al. Long noncoding RNA SNHG7 promotes the progression and growth of glioblastoma via inhibition of miR-5095. *Biochemical and biophysical research communications* 2018; **496**:712-718.
  74. SHE K, HUANG J, ZHOU H et al. lncRNA-SNHG7 promotes the proliferation, migration and invasion and inhibits apoptosis of lung cancer cells by enhancing the FAIM2 expression. *Oncology reports* 2016; **36**:2673-2680.
  75. GENG Y, LEE YM, WELCKER M et al. Kinase-independent function of cyclin E. *Molecular cell* 2007; **25**:127-39.
  76. DONANGELO I, REN SG, EIGLER T et al. Sca1(+) murine pituitary adenoma cells show tumor-growth advantage. *Endocrine-related cancer* 2014; **21**:203-16.
  77. TOUSOULIS D, BRIASOULIS A, VOGIATZI G et al. Infusion of lin-/sca-1+ and endothelial progenitor cells improves proinflammatory and oxidative stress markers in atherosclerotic mice. *International journal of cardiology* 2013; **167**:1900-5.
  78. SAINT FLEUR S, HOSHINO A, KONDO K et al. Regulation of Fas-mediated immune homeostasis by an activation-induced protein, Cyclon. *Blood* 2009; **114**:1355-65.
  79. YANG Y, ZHOU QJ, CHEN XQ et al. Profiling of differentially expressed genes in sheep T lymphocytes response to an artificial primary *Haemonchus contortus* infection. *Parasites & vectors* 2015; **8**:235.
  80. FLOUDAS A, SAUNDERS SP, MORAN T et al. IL-17 Receptor A Maintains and Protects the Skin Barrier To Prevent Allergic Skin Inflammation. *Journal of immunology* 2017; **199**:707-717.
  81. RIVERA J NTAL/LAB and LAT: a balancing act in mast-cell activation and function. *Trends in immunology* 2005; **26**:119-22.
  82. KORBER I, KATAYAMA S, EINARSDOTTIR E et al. Gene-Expression Profiling Suggests Impaired Signaling via the Interferon Pathway in Cstb-/- Microglia. *PloS one* 2016; **11**:e0158195.
  83. WANG Z, SUN B , ZHU F Molecular characterization of glutaminyl-peptide cyclotransferase(QPCT)in *Scylla paramamosain* and its role in *Vibrio alginolyticus* and white spot syndrome virus (WSSV) infection. *Fish & shellfish immunology* 2018; **78**:299-309.
  84. KARTBERG F, ASP L, DEJGAARD SY et al. ARFGAP2 and ARFGAP3 are essential for COPI coat assembly on the Golgi membrane of living cells. *The Journal of biological chemistry* 2010; **285**:36709-20.
  85. SAITOH A, SHIN HW, YAMADA A et al. Three homologous ArfGAPs participate in coat protein I-mediated transport. *The Journal of biological chemistry* 2009; **284**:13948-57.
  86. MARTINEZ A, YAMASHITA S, NAGAIKE T et al. Human BCDIN3D monomethylates cytoplasmic histidine transfer RNA. *Nucleic acids research* 2017; **45**:5423-5436.
  87. MCKINLEY KL, SEKULIC N, GUO LY et al. The CENP-L-N Complex Forms a Critical Node in an Integrated Meshwork of Interactions at the Centromere-Kinetochore Interface. *Molecular cell* 2015; **60**:886-98.
  88. MARJANOVIC M, SANCHEZ-HUERTAS C, TERRE B et al. CEP63 deficiency promotes p53-dependent

- microcephaly and reveals a role for the centrosome in meiotic recombination. *Nature communications* 2015; **6**:7676.
89. LOFFLER H, FECHTER A, MATUSZEWSKA M et al. Cep63 recruits Cdk1 to the centrosome: implications for regulation of mitotic entry, centrosome amplification, and genome maintenance. *Cancer research* 2011; **71**:2129-39.
90. ZHAO H, ZHU L, ZHU Y et al. The Cep63 paralogue Deup1 enables massive de novo centriole biogenesis for vertebrate multiciliogenesis. *Nature cell biology* 2013; **15**:1434-44.
91. SZCZEPANOWSKA K, MAITI P, KUKAT A et al. CLPP coordinates mitoribosomal assembly through the regulation of ERAL1 levels. *The EMBO journal* 2016; **35**:2566-2583.
92. GISPERS S, PARGANLIJA D, KLINKENBERG M et al. Loss of mitochondrial peptidase Clpp leads to infertility, hearing loss plus growth retardation via accumulation of CLPX, mtDNA and inflammatory factors. *Human molecular genetics* 2013; **22**:4871-87.
93. LIU B, SU Y, LI T et al. CMTM7 knockdown increases tumorigenicity of human non-small cell lung cancer cells and EGFR-AKT signaling by reducing Rab5 activation. *Oncotarget* 2015; **6**:41092-107.
94. KAKO K, TAKEHARA A, ARAI H et al. A selective requirement for copper-dependent activation of cytochrome c oxidase by Cox17p. *Biochemical and biophysical research communications* 2004; **324**:1379-85.
95. ONABAJO OO, SEELEY MK, KALE A et al. Actin-binding protein 1 regulates B cell receptor-mediated antigen processing and presentation in response to B cell receptor activation. *Journal of immunology* 2008; **180**:6685-95.
96. CONNERT S, WIENAND S, THIEL C et al. SH3P7/mAbp1 deficiency leads to tissue and behavioral abnormalities and impaired vesicle transport. *The EMBO journal* 2006; **25**:1611-22.
97. YUDIN AI, TOLLNER TL, TREECE CA et al. Beta-defensin 22 is a major component of the mouse sperm glycocalyx. *Reproduction* 2008; **136**:753-65.
98. HA S, LINDSAY AM, TIMMS AE et al. Mutations in Dnaaf1 and Lrrc48 Cause Hydrocephalus, Laterality Defects, and Sinusitis in Mice. *G3* 2016; **6**:2479-87.
99. VAN ROOIJEN E, GILES RH, VOEST EE et al. LRRC50, a conserved ciliary protein implicated in polycystic kidney disease. *Journal of the American Society of Nephrology : JASN* 2008; **19**:1128-38.
100. PHILLIPS NJ, ZEIGLER MR, DEAVEN LL A cDNA from the ovarian cancer critical region of deletion on chromosome 17p13.3. *Cancer letters* 1996; **102**:85-90.
101. SEVAJOL M, REISER JB, CHOUQUET A et al. The C-terminal polyproline-containing region of ELMO contributes to an increase in the life-time of the ELMO-DOCK complex. *Biochimie* 2012; **94**:823-8.
102. JAWOREK TJ, RICHARD EM, IVANOVA AA et al. An alteration in ELMOD3, an Arl2 GTPase-activating protein, is associated with hearing impairment in humans. *PLoS genetics* 2013; **9**:e1003774.
103. TAKEMOTO N, YOSHIMURA T, MIYAZAKI S et al. Gtsf1l and Gtsf2 Are Specifically Expressed in Gonocytes and Spermatids but Are Not Essential for Spermatogenesis. *PLoS one* 2016; **11**:e0150390.
104. CHOU TF, CHENG J, TIKH IB et al. Evidence that human histidine triad nucleotide binding protein 3 (Hint3) is a distinct branch of the histidine triad (HIT) superfamily. *Journal of molecular biology* 2007; **373**:978-89.
105. YOSHIKAWA K, MATSUI E, KANEKO H et al. A novel single-nucleotide substitution, Glu 4 Lys, in the leukotriene C4 synthase gene associated with allergic diseases. *International journal of molecular medicine* 2005; **16**:827-31.
106. HE P, LAIDLAW T, MAEKAWA A et al. Oxidative stress suppresses cysteinyl leukotriene generation by

- mouse bone marrow-derived mast cells. *The Journal of biological chemistry* 2011; **286**:8277-86.
107. CHU J, HONG NA, MASUDA CA et al. A mouse forward genetics screen identifies LISTERIN as an E3 ubiquitin ligase involved in neurodegeneration. *Proceedings of the National Academy of Sciences of the United States of America* 2009; **106**:2097-103.
108. OSSAREH-NAZARI B, NINO CA, BENGTSON MH et al. Ubiquitylation by the Ltn1 E3 ligase protects 60S ribosomes from starvation-induced selective autophagy. *The Journal of cell biology* 2014; **204**:909-17.
109. WEBB BD, WHEELER PG, HAGEN JJ et al. Novel, compound heterozygous, single-nucleotide variants in MARS2 associated with developmental delay, poor growth, and sensorineural hearing loss. *Human mutation* 2015; **36**:587-92.
110. TEVES ME, JHA KN, SONG J et al. Germ cell-specific disruption of the Meig1 gene causes impaired spermiogenesis in mice. *Andrology* 2013; **1**:37-46.
111. LOHOFF FW, FERRARO TN, BRODKIN ES et al. Association between polymorphisms in the metallophosphoesterase (MPPE1) gene and bipolar disorder. *American journal of medical genetics Part B, Neuropsychiatric genetics : the official publication of the International Society of Psychiatric Genetics* 2010; **153B**:830-6.
112. KONISHI H, TASHIRO K, MURATA Y et al. CFBP is a novel tyrosine-phosphorylated protein that might function as a regulator of CIN85/CD2AP. *The Journal of biological chemistry* 2006; **281**:28919-31.
113. MICHIHARA A, IDE N, MIZUTANI Y et al. Involvement of microRNA214 and transcriptional regulation in reductions in mevalonate pyrophosphate decarboxylase mRNA levels in stroke-prone spontaneously hypertensive rat livers. *Bioscience, biotechnology, and biochemistry* 2015; **79**:1759-70.
114. LEBON S, MINAI L, CHRETIEN D et al. A novel mutation of the NDUFS7 gene leads to activation of a cryptic exon and impaired assembly of mitochondrial complex I in a patient with Leigh syndrome. *Molecular genetics and metabolism* 2007; **92**:104-8.
115. MONIZ LS, SURINOVA S, GHAZALY E et al. Phosphoproteomic comparison of Pik3ca and Pten signalling identifies the nucleotidase NT5C as a novel AKT substrate. *Scientific reports* 2017; **7**:39985.
116. HAQUE ME, ELMORE KB, TRIPATHY A et al. Properties of the C-terminal tail of human mitochondrial inner membrane protein Oxa1L and its interactions with mammalian mitochondrial ribosomes. *The Journal of biological chemistry* 2010; **285**:28353-62.
117. CHURCH C, GOEHRING B, FORSHA D et al. A role for Pet100p in the assembly of yeast cytochrome c oxidase: interaction with a subassembly that accumulates in a pet100 mutant. *The Journal of biological chemistry* 2005; **280**:1854-63.
118. BELLIZZI D, DATO S, CAVALCANTE P et al. Characterization of a bidirectional promoter shared between two human genes related to aging: SIRT3 and PSMD13. *Genomics* 2007; **89**:143-50.
119. HIRANO Y, HAYASHI H, IEMURA S et al. Cooperation of multiple chaperones required for the assembly of mammalian 20S proteasomes. *Molecular cell* 2006; **24**:977-84.
120. WANG HM, XU YF, NING SL et al. The catalytic region and PEST domain of PTPN18 distinctly regulate the HER2 phosphorylation and ubiquitination barcodes. *Cell research* 2014; **24**:1067-90.
121. ZHANG X, WU M, XIAO H et al. Methylation of a single intronic CpG mediates expression silencing of the PMP24 gene in prostate cancer. *The Prostate* 2010; **70**:765-76.
122. HAO GJ, DING YH, WEN H et al. Attenuation of deregulated miR-369-3p expression sensitizes non-small cell lung cancer cells to cisplatin via modulation of the nucleotide sugar transporter SLC35F5. *Biochemical and biophysical research communications* 2017; **488**:501-508.

123. FAJARDO VA, RIETZE BA, CHAMBERS PJ et al. Effects of sarcolipin deletion on skeletal muscle adaptive responses to functional overload and unload. *American journal of physiology Cell physiology* 2017; **313**:C154-C161.
124. LI J, ZHOU F, ZHAN D et al. A novel histone H4 arginine 3 methylation-sensitive histone H4 binding activity and transcriptional regulatory function for signal recognition particle subunits SRP68 and SRP72. *The Journal of biological chemistry* 2012; **287**:40641-51.
125. NAGAMINE S, TAMBA M, ISHIMINE H et al. Organ-specific sulfation patterns of heparan sulfate generated by extracellular sulfatases Sulf1 and Sulf2 in mice. *The Journal of biological chemistry* 2012; **287**:9579-90.
126. BERGE T, LEIKFOSS IS, BRORSON IS et al. The multiple sclerosis susceptibility genes TAGAP and IL2RA are regulated by vitamin D in CD4+ T cells. *Genes and immunity* 2016; **17**:118-27.
127. GODFROY O, UJI T, NAGASATO C et al. DISTAG/TBCCd1 Is Required for Basal Cell Fate Determination in Ectocarpus. *The Plant cell* 2017; **29**:3102-3122.
128. KANEKO KJ , DEPAMPHILIS ML TEAD4 establishes the energy homeostasis essential for blastocoel formation. *Development* 2013; **140**:3680-90.
129. BENHADDOU A, KEIME C, YE T et al. Transcription factor TEAD4 regulates expression of myogenin and the unfolded protein response genes during C2C12 cell differentiation. *Cell death and differentiation* 2012; **19**:220-31.
130. NISHIOKA N, YAMAMOTO S, KIYONARI H et al. Tead4 is required for specification of trophectoderm in pre-implantation mouse embryos. *Mechanisms of development* 2008; **125**:270-83.
131. YAGI R, KOHN MJ, KARAVANOVA I et al. Transcription factor TEAD4 specifies the trophectoderm lineage at the beginning of mammalian development. *Development* 2007; **134**:3827-36.
132. ALSTON CL, COMPTON AG, FORMOSA LE et al. Biallelic Mutations in TMEM126B Cause Severe Complex I Deficiency with a Variable Clinical Phenotype. *American journal of human genetics* 2016; **99**:217-27.
133. SANCHEZ-CABALLERO L, RUZZENENTE B, BIANCHI L et al. Mutations in Complex I Assembly Factor TMEM126B Result in Muscle Weakness and Isolated Complex I Deficiency. *American journal of human genetics* 2016; **99**:208-16.
134. SHEN DW, MA J, OKABE M et al. Elevated expression of TMEM205, a hypothetical membrane protein, is associated with cisplatin resistance. *Journal of cellular physiology* 2010; **225**:822-8.
135. ROSE AE, ZHAO C, TURNER EM et al. Arresting a Torsin ATPase reshapes the endoplasmic reticulum. *The Journal of biological chemistry* 2014; **289**:552-64.
136. BAHN E, SIEGERT S, PFANDER T et al. TorsinB expression in the developing human brain. *Brain research* 2006; **1116**:112-9.
137. CHUJO T , SUZUKI T Trmt61B is a methyltransferase responsible for 1-methyladenosine at position 58 of human mitochondrial tRNAs. *Rna* 2012; **18**:2269-76.
138. YAMAMOTO Y , SAKISAKA T Molecular machinery for insertion of tail-anchored membrane proteins into the endoplasmic reticulum membrane in mammalian cells. *Molecular cell* 2012; **48**:387-97.
139. NISHIZAWA Y, KONNO M, ASAI A et al. Oncogene c-Myc promotes epitranscriptome m(6)A reader YTHDF1 expression in colorectal cancer. *Oncotarget* 2018; **9**:7476-7486.
140. ZHAO X, CHEN Y, MAO Q et al. Overexpression of YTHDF1 is associated with poor prognosis in patients with hepatocellular carcinoma. *Cancer biomarkers : section A of Disease markers* 2018; **21**:859-868.
141. GONTAN C, ACHAME EM, DEMMERS J et al. RNF12 initiates X-chromosome inactivation by targeting REX1 for degradation. *Nature* 2012; **485**:386-90.

142. XU J, SYLVESTER R, TIGHE AP et al. Transcriptional activation of the suppressor of cytokine signaling-3 (SOCS-3) gene via STAT3 is increased in F9 REX1 (ZFP-42) knockout teratocarcinoma stem cells relative to wild-type cells. *Journal of molecular biology* 2008; **377**:28-46.
143. ZHAO F, ZHOU J, LI R et al. Novel function of LHFPL2 in female and male distal reproductive tract development. *Scientific reports* 2016; **6**:23037.
144. ZUCKER B, KAMA JA, KUHN A et al. Decreased Lin7b expression in layer 5 pyramidal neurons may contribute to impaired corticostriatal connectivity in huntington disease. *Journal of neuropathology and experimental neurology* 2010; **69**:880-95.
145. HORI K, KONNO D, MARUOKA H et al. MALS is a binding partner of IRSp53 at cell-cell contacts. *FEBS letters* 2003; **554**:30-4.
146. ENO C, SOLANKI B, PELEGRI F *aura* (mid1ip1l) regulates the cytoskeleton at the zebrafish egg-to-embryo transition. *Development* 2016; **143**:1585-99.
147. WYATT JS Cerebral oxygenation and haemodynamics in the foetus and newborn infant. *Philosophical transactions of the Royal Society of London Series B, Biological sciences* 1997; **352**:697-700.
148. WU Z, DERKS MFL, DIBBITS B et al. A Novel Loss-of-Function Variant in Transmembrane Protein 263 (TMEM263) of Autosomal Dwarfism in Chicken. *Frontiers in genetics* 2018; **9**:193.
149. SMITH BN, TICOZZI N, FALLINI C et al. Exome-wide rare variant analysis identifies TUBA4A mutations associated with familial ALS. *Neuron* 2014; **84**:324-31.
150. STORM MP, KUMPFMUELLER B, THOMPSON B et al. Characterization of the phosphoinositide 3-kinase-dependent transcriptome in murine embryonic stem cells: identification of novel regulators of pluripotency. *Stem cells* 2009; **27**:764-75.
151. NAKAI-FUTATSUGI Y, NIWA H *Zscan4* Is Activated after Telomere Shortening in Mouse Embryonic Stem Cells. *Stem cell reports* 2016; **6**:483-495.
152. ZHANG D, ZHAO T, ANG HS et al. AMD1 is essential for ESC self-renewal and is translationally down-regulated on differentiation to neural precursor cells. *Genes & development* 2012; **26**:461-73.
153. NISHIMURA K, NAKATSU F, KASHIWAGI K et al. Essential role of S-adenosylmethionine decarboxylase in mouse embryonic development. *Genes to cells : devoted to molecular & cellular mechanisms* 2002; **7**:41-7.
154. MROCZEK S, CHLEBOWSKA J, KULINSKI TM et al. The non-canonical poly(A) polymerase FAM46C acts as an onco-suppressor in multiple myeloma. *Nature communications* 2017; **8**:619.
155. ZHU YX, SHI CX, BRUINS LA et al. Loss of FAM46C Promotes Cell Survival in Myeloma. *Cancer research* 2017; **77**:4317-4327.
156. ELABD C, COUSIN W, UPADHYAYULA P et al. Oxytocin is an age-specific circulating hormone that is necessary for muscle maintenance and regeneration. *Nature communications* 2014; **5**:4082.
157. LIN YT, CHEN CC, HUANG CC et al. Oxytocin stimulates hippocampal neurogenesis via oxytocin receptor expressed in CA3 pyramidal neurons. *Nature communications* 2017; **8**:537.
158. GUPTA P, SOYOMBO AA, SHELTON JM et al. Disruption of PPT2 in mice causes an unusual lysosomal storage disorder with neurovisceral features. *Proceedings of the National Academy of Sciences of the United States of America* 2003; **100**:12325-30.
159. HARRISON FE, YU SS, VAN DEN BOSSCHE KL et al. Elevated oxidative stress and sensorimotor deficits but normal cognition in mice that cannot synthesize ascorbic acid. *Journal of neurochemistry* 2008; **106**:1198-208.
160. CAO Z, FANG Y, LU Y et al. Melatonin alleviates cadmium-induced liver injury by inhibiting the TXNIP-

- NLRP3 inflammasome. *Journal of pineal research* 2017; **62**.
161. LI J, YUE Z, XIONG W et al. TXNIP overexpression suppresses proliferation and induces apoptosis in SMMC7221 cells through ROS generation and MAPK pathway activation. *Oncology reports* 2017; **37**:3369-3376.
  162. HOOG JO , OSTBERG LJ Mammalian alcohol dehydrogenases--a comparative investigation at gene and protein levels. *Chemico-biological interactions* 2011; **191**:2-7.
  163. POON HF, FRASIER M, SHREVE N et al. Mitochondrial associated metabolic proteins are selectively oxidized in A30P alpha-synuclein transgenic mice--a model of familial Parkinson's disease. *Neurobiology of disease* 2005; **18**:492-8.
  164. XIAO Y, LIU J, PENG Y et al. GSTA3 Attenuates Renal Interstitial Fibrosis by Inhibiting TGF-Beta-Induced Tubular Epithelial-Mesenchymal Transition and Fibronectin Expression. *PloS one* 2016; **11**:e0160855.
  165. MENG L, RIJNTJES E, SWARTS H et al. Dietary-Induced Chronic Hypothyroidism Negatively Affects Rat Follicular Development and Ovulation Rate and Is Associated with Oxidative Stress. *Biology of reproduction* 2016; **94**:90.
  166. HAYES JD , PULFORD DJ The glutathione S-transferase supergene family: regulation of GST and the contribution of the isoenzymes to cancer chemoprotection and drug resistance. *Critical reviews in biochemistry and molecular biology* 1995; **30**:445-600.
  167. FLOGEL U, GODECKE A, KLOTZ LO et al. Role of myoglobin in the antioxidant defense of the heart. *FASEB journal : official publication of the Federation of American Societies for Experimental Biology* 2004; **18**:1156-8.
  168. TUNSTER SJ, CREETH HDJ , JOHN RM The imprinted Phlda2 gene modulates a major endocrine compartment of the placenta to regulate placental demands for maternal resources. *Developmental biology* 2016; **409**:251-260.
  169. JIN F, QIAO C, LUAN N et al. Lentivirus-mediated PHLDA2 overexpression inhibits trophoblast proliferation, migration and invasion, and induces apoptosis. *International journal of molecular medicine* 2016; **37**:949-57.
  170. YU J, LU Y, LI Y et al. Role of S100A1 in hypoxia-induced inflammatory response in cardiomyocytes via TLR4/ROS/NF-kappaB pathway. *The Journal of pharmacy and pharmacology* 2015; **67**:1240-50.
  171. SAKAMOTO A , SUGAMOTO Y Identification of a novel aldose reductase-like gene upregulated in the failing heart of cardiomyopathic hamster. *Molecular and cellular biochemistry* 2011; **353**:275-81.
  172. XIONG W, QIU SY, XU LY et al. Effects of intermedin on dorsal root ganglia in the transmission of neuropathic pain in chronic constriction injury rats. *Clinical and experimental pharmacology & physiology* 2015; **42**:780-7.
  173. KOLTAI T Clusterin: a key player in cancer chemoresistance and its inhibition. *OncoTargets and therapy* 2014; **7**:447-56.
  174. SANSANWAL P, LI L , SARWAL MM Inhibition of intracellular clusterin attenuates cell death in nephropathic cystinosis. *Journal of the American Society of Nephrology : JASN* 2015; **26**:612-25.
  175. LIN CC, TSAI P, SUN HY et al. Apolipoprotein J, a glucose-upregulated molecular chaperone, stabilizes core and NS5A to promote infectious hepatitis C virus virion production. *Journal of hepatology* 2014; **61**:984-93.
  176. UTHEIM TP, SALVANOS P, UTHEIM OA et al. Transcriptome Analysis of Cultured Limbal Epithelial Cells on an Intact Amniotic Membrane following Hypothermic Storage in Optisol-GS. *Journal of functional*



biomaterials 2016; **7**.

177. ANTOGNELLI C, PALUMBO I, ARISTEI C et al. Glyoxalase I inhibition induces apoptosis in irradiated MCF-7 cells via a novel mechanism involving Hsp27, p53 and NF-kappaB. *British journal of cancer* 2014; **111**:395-406.
178. SARTO C, BINZ PA, MOCARELLI P Heat shock proteins in human cancer. *Electrophoresis* 2000; **21**:1218-26.
179. PARCELLIER A, SCHMITT E, GURBUXANI S et al. HSP27 is a ubiquitin-binding protein involved in I-kappaBalpha proteasomal degradation. *Molecular and cellular biology* 2003; **23**:5790-802.
180. HERDER C, DE LAS HERAS GALA T, CARSTENSEN-KIRBERG M et al. Circulating Levels of Interleukin 1- Receptor Antagonist and Risk of Cardiovascular Disease: Meta-Analysis of Six Population-Based Cohorts. *Arteriosclerosis, thrombosis, and vascular biology* 2017; **37**:1222-1227.
181. ZAND B, PREVIS RA, ZACHARIAS NM et al. Role of Increased n-acetylaspartate Levels in Cancer. *Journal of the National Cancer Institute* 2016; **108**:djv426.
182. WANG Z, CAO CJ, HUANG LL et al. EFEMP1 promotes the migration and invasion of osteosarcoma via MMP-2 with induction by AEG-1 via NF-kappaB signaling pathway. *Oncotarget* 2015; **6**:14191-208.
183. YAN L, LI Q, YANG J et al. TPX2-p53-GLIPR1 regulatory circuitry in cell proliferation, invasion, and tumor growth of bladder cancer. *Journal of cellular biochemistry* 2018; **119**:1791-1803.
184. WU MM, LI CF, LIN LF et al. Promoter hypermethylation of LGALS4 correlates with poor prognosis in patients with urothelial carcinoma. *Oncotarget* 2017; **8**:23787-23802.
185. ARIKAWA T, SIMAMURA E, SHIMADA H et al. Expression pattern of Galectin 4 in rat placentation. *Placenta* 2012; **33**:885-7.
186. MUTO M, FUJIHARA Y, TOBITA T et al. Lentiviral Vector-Mediated Complementation Restored Fetal Viability but Not Placental Hyperplasia in Plac1-Deficient Mice. *Biology of reproduction* 2016; **94**:6.
187. YANG X, LI Y, LI L et al. SnoRNAs are involved in the progression of ulcerative colitis and colorectal cancer. *Digestive and liver disease : official journal of the Italian Society of Gastroenterology and the Italian Association for the Study of the Liver* 2017; **49**:545-551.
188. YOSHIDA K, TODEN S, WENG W et al. SNORA21 - An Oncogenic Small Nucleolar RNA, with a Prognostic Biomarker Potential in Human Colorectal Cancer. *EBioMedicine* 2017; **22**:68-77.
189. PAN YZ, ZHOU A, HU Z et al. Small nucleolar RNA-derived microRNA hsa-miR-1291 modulates cellular drug disposition through direct targeting of ABC transporter ABCC1. *Drug metabolism and disposition: the biological fate of chemicals* 2013; **41**:1744-51.
190. PERRETTI M, D'ACQUISTO F Annexin A1 and glucocorticoids as effectors of the resolution of inflammation. *Nature reviews Immunology* 2009; **9**:62-70.
191. ZHANG Q, RAHIM MM, ALLAN DS et al. Mouse Nkrp1-Clr gene cluster sequence and expression analyses reveal conservation of tissue-specific MHC-independent immunosurveillance. *PloS one* 2012; **7**:e50561.
192. PARK OH, PARK J, YU M et al. Identification and molecular characterization of cellular factors required for glucocorticoid receptor-mediated mRNA decay. *Genes & development* 2016; **30**:2093-2105.
193. MATSUMOTO M, KANOUCHI H, SUZUKI K et al. Purification and characterization of perchloric acid soluble protein from rat lung. *Comparative biochemistry and physiology Part B, Biochemistry & molecular biology* 2003; **135**:255-62.
194. MANTUANO E, AZMOON P, BRIFALTO C et al. Tissue-type plasminogen activator regulates macrophage activation and innate immunity. *Blood* 2017; **130**:1364-1374.
195. MICHAEL JV, WURTZEL JGT, MAO GF et al. Platelet microparticles infiltrating solid tumors transfer miRNAs

- that suppress tumor growth. *Blood* 2017; **130**:567-580.
196. WANDERNOTH PM, MANNOWETZ N, SZCZYRBA J et al. Normal Fertility Requires the Expression of Carbonic Anhydrases II and IV in Sperm. *The Journal of biological chemistry* 2015; **290**:29202-16.
197. ZHANG X, WEISSMAN SM , NEWBURGER PE Long intergenic non-coding RNA HOTAIRM1 regulates cell cycle progression during myeloid maturation in NB4 human promyelocytic leukemia cells. *RNA biology* 2014; **11**:777-87.
198. SCHLAKE T , BOEHM T Expression domains in the skin of genes affected by the nude mutation and identified by gene expression profiling. *Mechanisms of development* 2001; **109**:419-22.
199. BERLETCH JB, DENG X, NGUYEN DK et al. Female bias in RhoX6 and 9 regulation by the histone demethylase KDM6A. *PLoS genetics* 2013; **9**:e1003489.
200. JANER A, ANTONICKA H, LALONDE E et al. An RMND1 Mutation causes encephalopathy associated with multiple oxidative phosphorylation complex deficiencies and a mitochondrial translation defect. *American journal of human genetics* 2012; **91**:737-43.
201. MOUTA CARREIRA C, LAVALLEE TM, TARANTINI F et al. S100A13 is involved in the regulation of fibroblast growth factor-1 and p40 synaptotagmin-1 release in vitro. *The Journal of biological chemistry* 1998; **273**:22224-31.
202. STURCHLER E, COX JA, DURUSSEL I et al. S100A16, a novel calcium-binding protein of the EF-hand superfamily. *The Journal of biological chemistry* 2006; **281**:38905-17.
203. WILSON JA, PROW NA, SCHRODER WA et al. RNA-Seq analysis of chikungunya virus infection and identification of granzyme A as a major promoter of arthritic inflammation. *PLoS pathogens* 2017; **13**:e1006155.
204. FALCO G, LEE SL, STANGHELLINI I et al. Zscan4: a novel gene expressed exclusively in late 2-cell embryos and embryonic stem cells. *Developmental biology* 2007; **307**:539-50.
205. STORM MP, KUMPFMUELLER B, BONE HK et al. Zscan4 is regulated by PI3-kinase and DNA-damaging agents and directly interacts with the transcriptional repressors LSD1 and CtBP2 in mouse embryonic stem cells. *PloS one* 2014; **9**:e89821.
206. ZALZMAN M, FALCO G, SHAROVA LV et al. Zscan4 regulates telomere elongation and genomic stability in ES cells. *Nature* 2010; **464**:858-63.
